1 **Combining CRISPR/Cas9 and brain imaging: from genes to proteins to**  
2 **networks**

3 Sabina Marciano<sup>1</sup>, Tudor Mihai Ionescu<sup>1</sup>, Ran Sing Saw<sup>1</sup>, Rachel Y. Cheong<sup>2</sup>, Deniz Kirik<sup>2</sup>,  
4 Andreas Maurer<sup>1</sup>, Bernd J. Pichler<sup>1</sup>, Kristina Herfert<sup>1\*</sup>

5

6

7

8

9

10

11 <sup>1</sup>Werner Siemens Imaging Center, Department of Preclinical Imaging and Radiopharmacy,  
12 Eberhard Karls University Tuebingen, Germany

13 <sup>2</sup>Brain Repair and Imaging in Neural Systems, Department of Experimental Medical Science,  
14 Lund University, Sweden

15

16 \*Corresponding author: Prof. Dr. Kristina Herfert ([kristina.herfert@med.uni-tuebingen.de](mailto:kristina.herfert@med.uni-tuebingen.de))

17

18 Address: Roentgenweg 13, 72076 Tuebingen, Germany, Tel: +49 7071 29 87680

19

## 20 **Abstract**

21 Understanding how functional connections between brain regions are arranged and influenced by  
22 genes, in the healthy and diseased states, is a major goal in neuroscience. Functional  
23 connectivity alterations are linked to molecular changes in several neurodegenerative disorders  
24 and could serve as early markers of pathology. Yet, the underlying molecular signatures driving  
25 the functional alterations remain largely unknown. Here, we combine CRISPR/Cas9 gene-editing  
26 with *in vivo* positron emission tomography (PET) and functional magnetic resonance imaging  
27 (fMRI) to investigate the direct link between genes, proteins, and the brain connectome. The  
28 extensive knowledge of the *Slc18a2* gene encoding the vesicular monoamine transporter  
29 (VMAT2), involved in the storage and release of dopamine, makes it an excellent basis for  
30 studying the gene networks relationships. We edited *Slc18a2* into the substantia nigra pars  
31 compacta of adult rats and used *in vivo* molecular imaging, behavioral, histological, and  
32 biochemical assessments to characterize the CRISPR/Cas9-mediated VMAT2 knockdown.  
33 Simultaneous PET/fMRI was performed to inspect the functional brain adaptations, beyond the  
34 predicted dopaminergic changes. Further, [<sup>11</sup>C]flumazenil PET was carried out to investigate the  
35 dopamine-GABA interplay. We found a regional increase in postsynaptic dopamine receptor  
36 availability, preceded by a reorganization of brain networks that adapt to reduced dopamine  
37 transmission states by becoming functionally connected and organized. The hyperconnectivity  
38 within and between brain networks spreads from the contralateral thalamus and prefrontal cortical  
39 regions to the striata and hippocampi. Additionally, impaired striatal dopamine release reduces  
40 GABA-A receptor availability, complementing the increased synchrony and functional connectivity  
41 between networks observed at rest. Our study reveals that recruiting different brain networks may  
42 be an early response to the dopaminergic dysfunction preceding neuronal cell loss, postsynaptic  
43 changes, and motor impairment in neurodegenerative disorders such as Parkinson's disease.  
44 We anticipate our combinatorial approach to be a starting point to investigate the impact of

45 specific genes on brain molecular and functional dynamics, aiding in the identification of early  
46 neurobiological markers and promising therapeutic interventions.

47

48

49

50 **Keywords**

51 CRISPR/Cas9, Functional Connectivity, Dopamine, VMAT2, D2 receptor, [<sup>11</sup>C]raclopride,

52 PET/fMRI.

53

## 54 **Introduction**

55 The brain is a network of spatially distributed but functionally and structurally interconnected  
56 regions that exhibit correlated activity over time. They communicate with each other via highly  
57 specialized neuronal connections and are organized in neuronal circuits and networks.

58 Understanding how functional connections between regions are arranged in the healthy and  
59 diseased brain is therefore of great interest.

60 Resting-state functional magnetic resonance imaging (rs-fMRI) has enabled neuroscientists to  
61 delineate the level of functional communication between anatomically separated regions [1]. Rs-  
62 fMRI measures the resting-state functional connectivity (rs-FC) at high spatial and temporal  
63 resolutions based on spontaneous fluctuations of the blood oxygen level-dependent (BOLD)  
64 signal at rest, which indirectly detects neuronal activity via hemodynamic coupling [2]. Using rs-  
65 fMRI several brain resting-state networks in humans and rodents have been identified, such as  
66 the default mode and sensorimotor networks (DMN, SMN) [3-9]. Alterations of these networks are  
67 linked to neurological diseases [10, 11], and may serve as early therapeutic and diagnostic  
68 biomarkers. However, the molecular signatures related to the functional alterations in disease  
69 remain largely unknown.

70 Positron emission tomography (PET) provides a non-invasive tool to indirectly measure molecular  
71 changes in the brain with high specificity and sensitivity. One well-characterized example is the  
72 radioligand [<sup>11</sup>C]raclopride, a widely used D2/D3 receptor antagonist enabling the non-invasive  
73 determination of dopamine release and availability [12-14].

74 PET in combination with BOLD-fMRI has the great potential to investigate the molecular  
75 substrate of brain functional connectivity (FC), enabling the direct spatial and temporal correlation  
76 of both measurements [15-21]. In this context, we have recently shown that rs-FC is modulated  
77 by intrinsic serotonin transporter and D2/3 receptor occupancy in rats [22].

78 Insights into functional brain circuits and their relationships to individual phenotypes can be  
79 gained by genetic manipulations of neuronal subtypes [23]. Genome-engineering methodologies  
80 based on clustered regularly interspaced short palindromic repeats (CRISPR)/associated RNA-  
81 guided endonuclease (Cas9) represent a promising approach to unveil the influence of genes on  
82 brain circuits. CRISPR/Cas9 has enabled researchers to interrogate the mammalian DNA in a  
83 precise yet simple manner [24, 25] in several species [26-31], by editing single or multiple  
84 genomic loci *in vitro* and *in vivo* [25, 32, 33]. However, one great hurdle is the brain delivery,  
85 which must comply with effective nuclear access, while minimizing immunogenic reactions and  
86 off-target editing [34]. Despite these limitations, the potential of CRISPR/Cas9 is continuously  
87 expanding with novel nuclease variants being exploited [35-37]. Derived from *Staphylococcus*  
88 *aureus*, SaCas9 overcomes the packaging constraints of adeno-associated viral vectors (AAVs),  
89 allowing efficient CRISPR/Cas9 brain transfer [38-42].

90 Here, we use an AAV-based CRISPR/SaCas9 gene-editing approach to knock down the *Slc18a2*  
91 gene encoding the vesicular monoamine transporter 2 (VMAT2), a key protein involved in the  
92 storage and release of dopamine in the brain [43]. The extensive knowledge on *Slc18a2* makes it  
93 an excellent basis for studying the gene-networks relationships. We characterize the VMAT2-  
94 mediated dopamine signaling using *in vivo* molecular imaging, behavioral, histological, and  
95 biochemical assessments. We investigate the impact of impaired VMAT2-dependent dopamine  
96 neurotransmission on the DMN and SMN using a simultaneous [<sup>11</sup>C]raclopride-PET/fMRI  
97 protocol. Further, we dig into the dopamine-GABA interplay using [<sup>11</sup>C]flumazenil PET. Our  
98 results reveal that CRISPR/SaCas9-induced synaptic dysfunction prompts early network  
99 changes, preceding motor and molecular alterations, including a regional increase in postsynaptic  
100 dopamine receptor availability. We identify a pattern of asymmetric hyperconnectivity, and  
101 internetwork synchronization, spreading from the contralateral thalamus (SMN), and prefrontal  
102 cortical regions (DMN) to the striata and hippocampi, complemented by a reduced GABA-A  
103 receptor availability.

104 Our findings illustrate the ability of the brain to recruit different brain networks and functionally  
105 compensate for the dopaminergic dysfunction prior to neuronal cell loss, postsynaptic changes,  
106 and motor impairment.

107

## 108 **Results**

### 109 ***In vitro* validation of CRISPR/SaCas9-induced VMAT2 knockdown in rat primary cortical** 110 **neurons**

111 To evaluate the efficiency of the AAV-based CRISPR/SaCas9 VMAT2 knockdown in rat primary  
112 neurons, we designed AAV-SaCas9 and AAV-sgRNA targeting the first exon of the bacterial *lacZ*  
113 gene (control) or the second exon of the *Slc18a2* gene (Fig. 1a) (sgRNAs sequences are  
114 reported in Table 1). Seven days post-transduction, the protein expression level and mutation  
115 rate of the harvested genomic DNA were inspected by immunofluorescence and surveyor assay  
116 (Fig. 1b). Immunofluorescence indicated a clear reduction of VMAT2 protein expression in  
117 neurons transduced with AAV-SaCas9 and AAV-sgRNA-*Slc18a2* (Fig. 1c). We observed 20%  
118 editing for the digested DNA from neurons transduced with vectors for SaCas9 and sgRNA-  
119 *Slc18a2* (Supplementary Fig.1).

120

### 121 **CRISPR/SaCas9-induced VMAT2 knockdown elicits postsynaptic changes but no nerve** 122 **terminal loss or neuroinflammation in the adult rat brain**

123 To test the *in vivo* efficiency of the CRISPR/SaCas9 gene-editing, we expressed SaCas9 and  
124 sgRNA targeting *Slc18a2* to knock down the VMAT2, or targeting *lacZ* as control, by AAV-  
125 mediated gene transfer into the right substantia nigra pars compacta (SNc). DPBS was injected  
126 into the left SNc. [<sup>11</sup>C]Dihydrotrabenazine (DTBZ) PET imaging was performed 8 – 10 weeks  
127 post-injection to quantify VMAT2 expression in the striatum (Fig. 2a).

128 [<sup>11</sup>C]DTBZ binding was decreased by 30% in the right striatum of rats where the VMAT2 was  
129 knocked down in comparison to the contralateral striatum. No changes of [<sup>11</sup>C]DTBZ binding were  
130 observed in the contralateral striatum, as [<sup>11</sup>C]DTBZ binding did not differ between the left  
131 striatum of rats injected with sgRNA targeting *lacZ* and rats injected with sgRNA targeting  
132 *Slc18a2* (Fig. 2b,c).

133 We further evaluated changes of dopamine availability in the striatum using [<sup>11</sup>C]raclopride, which  
134 competes with dopamine for the same binding site at the D2 receptor (D2R) [13]. After 12 –  
135 14 weeks following CRISPR/SaCas9-induced VMAT2 knockdown in nigrostriatal neurons, we  
136 observed 17% increased binding of [<sup>11</sup>C]raclopride in the right striatum of VMAT2 knockdown rats  
137 and no changes in control rats (Fig. 2b,c), indicating a reduction of synaptic dopamine levels  
138 and/or compensatory changes of D2R expression at postsynaptic medium spiny neurons. A  
139 larger VMAT2 knockdown led to lower dopamine levels in the striatum and thus to higher D2R  
140 binding (Fig. 2d). To explore the threshold at which the observed postsynaptic changes occur, we  
141 calculated the [<sup>11</sup>C]raclopride/[<sup>11</sup>C]DTBZ binding ratio for the right and left striatum. The ratio  
142 remained close to 1 in the DPBS-injected striatum and control rats, indicating no substantial  
143 difference between the two hemispheres. In contrast, VMAT2 knockdown rats displayed large  
144 [<sup>11</sup>C]raclopride binding changes when the level of VMAT2 knockdown was ~ 20%. From this  
145 point, a prominent increase in D2R binding was observed in the right striatum (Fig. 2e).  
146 Therefore, this threshold was set to split the rats into *mild* (< 20%) and *moderate* (≥ 20%).  
147 Notably, [<sup>11</sup>C]raclopride PET imaging was able to discriminate between different degrees of  
148 synaptic dysfunction, classified from [<sup>11</sup>C]DTBZ binding changes (Fig. 2f).

149 We inspected the integrity of dopaminergic nerve terminals and the occurrence of  
150 neuroinflammation in the striatum after the CRISPR/SaCas9-induced VMAT2 knockdown.  
151 [<sup>11</sup>C]methylphenidate PET imaging of the dopamine transporter and [<sup>18</sup>F]GE-180 PET imaging of  
152 the translocator protein, which is overexpressed on activated microglia, was performed.

153 CRISPR/SaCas9-induced VMAT2 knockdown did neither alter [ $^{11}\text{C}$ ]methylphenidate binding, nor  
154 [ $^{18}\text{F}$ ]GE-180 uptake (Fig. 2b,c).

155

### 156 **CRISPR/SaCas9-induced VMAT2 knockdown impairs motor function**

157 To explore the motor consequences of the CRISPR/SaCas9-induced VMAT2 knockdown, we  
158 performed several behavioral tests (Fig. 3a).

159 We observed a reduction in the locomotor activity of VMAT2 knockdown rats in the open field test  
160 (Fig. 3a), but no correlation to VMAT2 expression changes ( $\Delta$  [ $^{11}\text{C}$ ]DTBZ binding), or dopamine  
161 availability ( $\Delta$  [ $^{11}\text{C}$ ]raclopride binding) (Supplementary Fig. 2a,b).

162 Next, we evaluated the forelimb akinesia using the cylinder test. VMAT2 knockdown rats  
163 displayed a preference for the right forepaw, while control rats equivalently used their right and  
164 left forepaw (Fig. 3c). Paw use alterations correlated highly with VMAT2 knockdown ( $\Delta$  [ $^{11}\text{C}$ ]DTBZ  
165 binding), and dopamine availability ( $\Delta$  [ $^{11}\text{C}$ ]raclopride binding) (Fig. 3d,e).

166 To further examine differences in motor function, coordination, and balance, rats underwent the  
167 beam walk test. VMAT2 knockdown rats stumbled with higher frequency to the left side, while  
168 control rats displayed equal chances to slip in each direction (Fig. 3f). However, no correlations  
169 between gait alterations and VMAT2 knockdown ( $\Delta$  [ $^{11}\text{C}$ ]DTBZ binding), or dopamine availability  
170 ( $\Delta$  [ $^{11}\text{C}$ ]raclopride binding) were found (Supplementary Fig. 2c,d).

171 As previous studies suggest that body weight changes reflect striatal dopamine depletion [44], we  
172 inspected the impact of the VMAT2 knockdown on the rats' body weight gain. VMAT2 knockdown  
173 rats exhibited a 30% reduction in their gained weight over a period of 14 weeks, compared with  
174 controls (Fig. 3g). Body weight gain correlated with changes in VMAT2 expression ( $\Delta$  [ $^{11}\text{C}$ ]DTBZ  
175 binding), and dopamine availability ( $\Delta$  [ $^{11}\text{C}$ ]raclopride binding) (Fig. 3h,i).

176 To assess the rotational behavior, we performed the rotameter test with and without apomorphine  
177 administration. In the spontaneous rotation test, VMAT2 knockdown rats displayed a higher  
178 number of ipsilateral net turns compared with control rats (Fig. 3j). The number of turns did not



179 correlate with VMAT2 expression changes ( $\Delta$  [ $^{11}\text{C}$ ]DTBZ binding), and changes in dopamine  
180 availability ( $\Delta$  [ $^{11}\text{C}$ ]raclopride binding) (Supplementary Fig. 2e,f). Apomorphine-induced rotations  
181 to the contralateral side were higher in VMAT2 knockdown rats compared with control rats (Fig.  
182 3k), and correlated with changes in VMAT2 expression ( $\Delta$  [ $^{11}\text{C}$ ]DTBZ binding) and dopamine  
183 availability ( $\Delta$  [ $^{11}\text{C}$ ]raclopride binding) (Fig. 3l,m).

184

### 185 **Ex vivo validation of the CRISPR/SaCas9-induced VMAT2 knockdown**

186 Using immunofluorescence, we confirmed the concomitant expression of SaCas9 and *Slc18a2*-  
187 targeting sgRNA 19 weeks post-transduction, and a corresponding decrease of VMAT2  
188 expression in the SNc of the VMAT2 knockdown group (Fig. 4b).

189 Immunohistochemistry revealed no changes in tyrosine hydroxylase (TH) expression levels in  
190 striatum and SN in both groups (Fig. 4c,d), and confirmed the reduction of VMAT2 expression in  
191 the right striatum and SN in the knockdown group (Fig. 4e).

192 Biochemical analysis showed a large reduction of dopamine, paralleled by an increased ratio of  
193 metabolites (DOPAC, HVA) to dopamine, in the right striatum of VMAT2 knockdown rats (Fig.  
194 4f,g). The reduced dopamine content correlated with the *in vivo* VMAT2 expression ( $\Delta$  [ $^{11}\text{C}$ ]DTBZ  
195  $\text{BP}_{\text{ND}}$ ) and postsynaptic changes ( $\Delta$  [ $^{11}\text{C}$ ]RAC  $\text{BP}_{\text{ND}}$ ) (Fig. 4h,i). Additionally, serotonin was  
196 unchanged in the striata of VMAT2 knockdown and control rats, suggesting dopamine  
197 nigrostriatal pathway specificity (Fig. 4j) (Metabolites' and neurotransmitters' striatal levels are  
198 reported in Table 3).

199

### 200 **Increased resting-state functional connectivity after CRISPR/SaCas9-induced VMAT2** 201 **knockdown**

202 As multiple lines of evidence suggest a broader role of dopamine in the dynamic reconfiguration  
203 of brain networks [17, 45, 46], we next investigated the impact of unilateral dopamine depletion  
204 on brain rs-FC. A second cohort of rats underwent longitudinal simultaneous [ $^{11}\text{C}$ ]raclopride-

205 PET/BOLD-fMRI scans at baseline and 8 - 14 weeks after CRISPR/SaCas9-induced VMAT2  
206 knockdown (Fig. 5a). [<sup>11</sup>C]DTBZ PET scans and behavioral analysis confirmed previous findings  
207 in the first cohort, that is, an efficient depletion of the VMAT2 (20% decrease of [<sup>11</sup>C]DTBZ  
208 binding) (Supplementary Fig. 3a), paralleled by motor disturbances in the cylinder test  
209 (Supplementary Fig. 3e-g). In line with the findings of cohort 1, dopamine availability was  
210 decreased (10% increase in [<sup>11</sup>C]raclopride binding) and correlated to the extent of the VMAT2  
211 knockdown (Supplementary Fig. 3b,c). An increase in D2R binding was observed in the right  
212 striatum when the level of VMAT2 knockdown reached ~ 20% (Supplementary Fig. 3d), enabling  
213 a subdivision into *mild* (< 20%) and *moderate* rats (≥ 20%).

214 We next assessed the occurrence of rs-FC changes in DMN and SMN. Our analysis focused on  
215 identifying early biomarkers of *mild* dysfunction and patterns of spreading of synaptic dysfunction.  
216 Figure 5b,c illustrates intraregional rs-FC group-level correlation matrices at baseline and after  
217 VMAT2 knockdown in *mild* and *moderate* rats for the DMN and SMN, respectively. We observed  
218 within-network rs-FC changes in rats with *moderate* VMAT2 knockdown, in both DMN and SMN.  
219 Rats of the *mild* knockdown group revealed rs-FC changes up to 20%, in prefrontal cortical  
220 regions of the DMN, and between the left thalamus (Th) and somatosensory cortex (SC) in the  
221 SMN. However, these data need to be carefully interpreted as they did not survive a more  
222 stringent *P* value selection (*\*P* < 0.01) (Supplementary Fig.4a,b) (*P* values are reported in  
223 Supplementary Tables 1,3).

224 Rats with *moderate* VMAT2 knockdown exhibited a 60% increase in rs-FC within the right medial  
225 prefrontal cortex (mPFC) and the right and left hippocampus (Hipp) (Fig. 5b) (*P* values are  
226 reported in Supplementary Table 2).

227 FC increase between the left thalamus and somatosensory cortex in the SMN doubled to 34% in  
228 rats with *moderate* VMAT2 knockdown and extended throughout the left and right thalamus and  
229 striatum (STR), respectively (Fig. 5c) (*P* values are reported in Supplementary Table 4).

230 Moreover, we inspected rs-FC changes between the DMN and SMN at baseline and after the  
231 CRISPR/SaCas9-induced VMAT2 knockdown.

232 Figure 5d illustrates internetwork rs-FC correlation matrices in rats with *mild* (left panel) and  
233 *moderate* (right panel) VMAT2 knockdown. Brain graphs display the nodes and edges (raw  
234 values) that demonstrated internetwork rs-FC changes to baseline (%). Strikingly, large  
235 alterations between DMN and SMN were already observable in the *mild* VMAT2 knockdown  
236 group. Rats presented opposite rs-FC changes between regions of the anterior/posterior DMN  
237 and the SMN, compared with baseline. A 30 to 60% increase in rs-FC was observed between  
238 regions of the anterior DMN and the SMN. Specifically, rs-FC increased between the right  
239 orbitofrontal cortex (OFC) and striatum bilaterally and the contralateral somatosensory cortex,  
240 and between the contralateral orbitofrontal cortex and striatum. Instead, a 20% decrease in rs-FC  
241 was found between regions of the posterior DMN and the SMN. Specifically, rs-FC decreased  
242 between the left retrosplenial cortex (RSC) and right somatosensory cortex (Fig. 5d, left panel) (*P*  
243 values are reported in Supplementary Table 5).

244 Rats with a *moderate* VMAT2 knockdown presented increased rs-FC between regions of the  
245 anterior/posterior DMN and the SMN, compared with baseline. Of particular note, internetwork rs-  
246 FC changes were not found between the regions of the posterior DMN and the SMN that showed  
247 decreased rs-FC in rats with *mild* VMAT2 knockdown. Moreover, between-network rs-FC  
248 increase extended to other regions. A 60 to 80% increase in rs-FC was found between the medial  
249 prefrontal cortex and the right striatum, and the motor (MC) and somatosensory cortex bilaterally.  
250 FC increased by more than 20% between the hippocampi and contralateral somatosensory  
251 cortex. (Fig. 5d, right panel) (*P* values are reported in Supplementary Table 6). Notably, between-  
252 network rs-FC changes did not involve the thalamus, which connectivity was however altered  
253 within the SMN.

254 Further, we examined how the rs-FC changes to baseline correlated between the *mild* and  
255 *moderate* groups (Supplementary Fig. 5a). Group level intraregional and internetwork rs-FC

256 changes to baseline (%) correlated linearly between the two groups (Supplementary Fig. 5b-d).  
257 Node correlation analysis indicated a linear increase in the magnitude of the rs-FC changes to  
258 baseline in the hippocampi (Supplementary Fig. 5e), cingulate cortices (Supplementary Fig. 5f),  
259 and contralateral, but not ipsilateral, thalamus (Supplementary Fig. 5g). Our data suggest a  
260 similarity in the pattern of the intraregional and internetwork rs-FC changes between *mild* and  
261 *moderate* VMAT2 knockdown rats and a linear relationship between the magnitude of the rs-FC  
262 changes.

263 To complement the results of the intraregional and internetwork rs-FC, we evaluated changes in  
264 regional mean connection distances. Network-wise graph theoretical analysis on node level was  
265 paralleled by whole-brain connection-wise analysis to identify the nodes that were significantly  
266 altered in rats with *mild* and *moderate* VMAT2 knockdown, compared with baseline, for the DMN  
267 (Supplementary Fig. 6a,b) and SMN (Supplementary Fig. 6c,d). Briefly, the network organization  
268 did not change in rats with *mild* VMAT2 knockdown, compared with baseline, as changes in the  
269 global mean connection distance were not found in DMN (Supplementary Fig. 6a) nor SMN  
270 (Supplementary Fig. 6c). Interestingly, in rats with *moderate* VMAT2 knockdown network  
271 organization changes did not influence regions of the DMN (Supplementary Fig. 6b), but occurred  
272 in the contralateral striatum and thalamus (Supplementary Fig. 6d) (*P* values are reported in  
273 Supplementary Table 7).

274 Collectively, rs-FC results highlight lateralized effects in the SMN, as opposed to the symmetric  
275 recruitment of DMN regions.

276

### 277 **CRISPR/SaCas9-induced VMAT2 knockdown alters GABA signaling**

278 Besides dopamine, dopaminergic neurons co-release GABA via the VMAT2 [47, 48]. To  
279 investigate if GABA neurotransmission is altered following the VMAT2 knockdown, we performed  
280 additional [<sup>11</sup>C]flumazenil PET scans 10 – 12 weeks after the CRISPR/Cas9-editing, and

281 quantified the GABA-A binding in regions of the DMN and SMN (Fig. 6). In *mild* VMAT2  
282 knockdown rats, we observed a decrease of [<sup>11</sup>C]flumazenil binding in the ipsilateral parietal  
283 cortex (PaC) (14%), hippocampus (4%), and somatosensory cortex (9%) (Fig. 6a,b). In *moderate*  
284 VMAT2 knockdown rats we observed a decrease of [<sup>11</sup>C]flumazenil binding in the ipsilateral  
285 parietal cortex (11%), and somatosensory cortex (6%) (Fig. 6a,c). Our data indicate that  
286 [<sup>11</sup>C]flumazenil binding was altered regardless of the VMAT2 knockdown extent. This was further  
287 evidenced by the lack of correlation between [<sup>11</sup>C]DTBZ and [<sup>11</sup>C]flumazenil binding changes in  
288 the target regions (linear regression data not shown).

289

## 290 **Discussion**

291 Here, we show the potential of combining CRISPR/Cas9 gene-editing with molecular and  
292 functional brain imaging to identify early adaptations of brain circuits in response to targeted gene  
293 and protein modulations. Using CRISPR/SaCas9, we knocked down the *Slc18a2* gene, encoding  
294 the VMAT2, which plays a key role in the storage and release of dopamine in response to  
295 neuronal activity [43]. The CRISPR-mediated knockdown allowed us to investigate the VMAT2-  
296 dependent dopamine signaling in the striatum, while structurally preserving neuronal integrity.  
297 [<sup>18</sup>F]GE-180 results suggest that glial activation is not the source of dopaminergic synaptic  
298 dysfunction, and exclude the occurrence of inflammatory responses arising from the surgical  
299 procedure and the chosen AAV-serotype, which could influence our readout, in line with recent  
300 reports [49]. Our data reveal that the targeted gene knockdown in the SNc leads to an expected  
301 reduction of dopamine release in the striatum, paralleled by [<sup>11</sup>C]raclopride binding changes. It is  
302 conceivable that the observed postsynaptic changes are the result of an increase in binding due  
303 to the reduced dopamine concentration in the striatum. Yet, several studies have revised this  
304 notion [50, 51]. In this regard, our results of the drug-evoked rotational behavior are in better  
305 agreement with a D2R compensatory upregulation. Indeed, supersensitivity to apomorphine in  
306 rats with nigrostriatal lesions or VMAT2 knockout is accompanied by an increase in striatal D2R

307 binding sites, but no change in affinity [52-57]. Further, the observed striatal increase in  
308 [<sup>11</sup>C]raclopride binding is independent of presynaptic nerve terminal loss and occurs in response  
309 to a ~ 20% decrease of [<sup>11</sup>C]DTBZ binding. This confirms, in line with our [<sup>11</sup>C]methylphenidate  
310 results, that [<sup>11</sup>C]raclopride can be used to delineate postsynaptic changes in the absence of  
311 dopamine transporter-mediated compensation, triggered by neuronal loss. Accordingly, increased  
312 [<sup>11</sup>C]raclopride binding is observed in the early but not later stages of Parkinson`s disease [58],  
313 characterized by severe neuronal cell loss, and dopamine transporter changes (> 50%) [59].  
314 Consistently, rats with severe denervation (> 75%) present earlier mitigation by the dopamine  
315 transporter, followed by D2R binding changes [60]. Hence, with our method, it is feasible to study  
316 the consequences of synaptic dopamine dysfunction without compensations triggered by  
317 neuronal cell loss. Moreover, the observed [<sup>11</sup>C]raclopride and [<sup>11</sup>C]DTBZ correlations to the  
318 motor behavior highlight that [<sup>11</sup>C]raclopride binding remains at control levels as long as synaptic  
319 dopamine levels are sufficient to maintain adequate motor function. Motor disturbances strongly  
320 correlate to pre and postsynaptic changes if movements of the forelimbs, but not whole-body, are  
321 considered, in agreement with earlier observations in dopamine-depleted rats [44]. Depletion of  
322 VMAT2 resulted in reduced dopamine tissue levels in the ipsilateral striatum, nicely merging with  
323 the *in vivo* data. Moreover, metabolite analysis suggested that due to the lack of VMAT2-  
324 mediated storage in presynaptic vesicles, dopamine is quickly converted. The increased  
325 metabolism might as well be a possible compensatory mechanism consequent to the VMAT2  
326 knockdown, reflecting actions that residual nigrostriatal neurons undertake to maintain dopamine  
327 homeostasis, as already speculated by others [53, 61].  
328 To elucidate the role of VMAT2 in locomotion, reward, and Parkinson`s disease, several  
329 investigators have deleted its coding gene in mice [62-65]. Besides the costly and time-  
330 consuming breeding, the gene knockout was not selective for dopaminergic neurons, resulting in  
331 the appearance of anxiety and depressive behavior phenotypes [66]. CRISPR/Cas9-editing  
332 overcomes these limitations, allowing gene-editing in adult and aged animals and avoiding

333 compensatory changes occurring at early developmental stages. Since its discovery, only two  
334 studies have successfully applied CRISPR/Cas9 in the rat brain [40, 67], where gene-editing has  
335 been difficult to adapt. Rats are particularly advantageous for imaging studies due to the larger  
336 brain size and limited spatial resolution and sensitivity of preclinical scanners [68]. Here, by  
337 inducing a *mild* to *moderate* gene knockdown, we could investigate early to late resting-state  
338 brain network adaptations prompted by presynaptic dysfunction. We show that the selective  
339 impairment of presynaptic dopamine storage and release is followed by rs-FC alterations within  
340 and between the DMN and SMN. Our results confirm previous findings that the DMN, associated  
341 with ideation and mind wandering [69], and the SMN, involved in sensory processing and motor  
342 function [70], do not function in isolation from each other, but rather synchronize [71]. The  
343 observed internetwork synchronization may reflect compensatory brain reorganization, as already  
344 speculated by others [72, 73]. We also identified enhanced intranetwork rs-FC in the DMN and  
345 SMN. Rs-FC changes were observed in prefrontal cortical regions, hippocampus, thalamus, and  
346 striatum. Our data parallel previous findings of cortico-striato-thalamic hyperconnectivity in  
347 decreased dopamine transmission states [74-77]. In line, increased synchronous neural  
348 oscillatory activity and functional coupling in the basal ganglia and its associated networks have  
349 been observed in Parkinson`s disease [78-83]. The increase of cortico-striatal FC could in part be  
350 due to dysfunctions of multiple tonic inhibitory gate actions of D2R [84]. Increased FC across the  
351 thalamus and prefrontal cortex has been reported in drug-treated Parkinson`s disease patients  
352 [85, 86], potentially indicating functional compensation, as the brain recruits additional anatomical  
353 areas to aid in restoring cognitive processes. This might as well explain the engagement of the  
354 hippocampus, functionally connected with DMN cortical regions [87, 88]. In this regard, research  
355 has shown that the hyperconnectivity of brain circuits is a common response to neurological  
356 dysfunction, and may reflect a protective mechanism to maintain normal brain functioning [89].  
357 Such a mechanism has been proposed in Parkinson`s disease, mild cognitive impairment, and  
358 Alzheimer's disease [90-93]. Collectively, our findings support this model and indicate a

359 reorganization of brain networks that adapt to the synaptic dysfunction through enhanced  
360 interregional synchrony. Recruiting alternative brain regions may be an early response to the  
361 dysfunction preceding neuronal cell loss and motor impairment. Interestingly, brain connectome  
362 adaptations occurred symmetrically in the DMN but were more weighted towards the contralateral  
363 hemisphere in the SMN.

364 Besides dopamine, dopaminergic neurons co-release GABA via the VMAT2. This hints towards  
365 reduced GABA following the VMAT2 knockdown, and consequent imbalance in downstream  
366 striatal projection neurons of the direct and indirect pathway [47, 48, 94]. GABA regulates the  
367 inhibitory neurotransmission in various brain areas through GABA-A receptors [95]. We  
368 hypothesize that decreased binding to the GABA-A receptors may be consistent with loss of  
369 inhibitory tone in multiple cortical areas, reflected by our [<sup>11</sup>C]flumazenil PET data, resulting in  
370 increased localized brain connectivity, reflected in the fMRI signal. The suppression of the  
371 GABAergic feedback circuit, mediated by D2R and external globus pallidus neurons [84],  
372 complements the observed elevation in neuronal synchronicity. Our postulation is in line with  
373 earlier findings of an inverse correlation of GABA with rs-FC in DMN [96] and with a putative role  
374 of loss of inhibitory tone in hyperconnectivity [97]. Interestingly, our [<sup>11</sup>C]flumazenil PET data did  
375 not reveal changes in GABA-A expression in the striatum. Instead, we observed a significant  
376 decrease in the ipsilateral hemisphere of several cortical regions in both *mild* and *moderate* rats,  
377 supporting previous findings of GABA modulation of the internetwork FC [98]. Studies report  
378 downregulated inhibitory neurotransmission in Parkinson`s disease, where gene expression of  
379 GABAergic markers is low in the frontal cortex [99, 100]. Further, inverse correlations between  
380 [<sup>11</sup>C]flumazenil binding and gait disturbances [101], and between GABA concentration in the  
381 motor cortex and disease severity have been reported [102]. Moreover, our [<sup>11</sup>C]flumazenil PET  
382 results suggest that GABA neurotransmission is disturbed already at the *mild* stage, indicating its  
383 potential role as an early biomarker of dopaminergic presynaptic dysfunction. Of note, the  
384 observed changes in GABA-A binding might indicate only an apparent decrease in binding due to



385 the reduced GABA availability, or reflect compensatory adaptation on the contralateral  
386 hemisphere. Future research should elucidate these aspects and also perform further  
387 investigations on glutamate, due to the crucial role of the excitatory/inhibitory-imbalance in  
388 several psychiatric disorders [103].

389

## 390 **Limitations and general remarks**

391 We knocked down VMAT2 in dopaminergic projection neurons from the SNc to the dorsal  
392 striatum. To achieve selective targeting of this neuronal subtype, rat Cre driver lines have been  
393 developed [67, 104]. Although all monoamine-releasing neurons express VMAT2, in contrast to  
394 other brain regions, SNc neurons are predominantly dopaminergic [105]. Thus, even though we  
395 used wild-type rats, we can largely dismiss effects on other monoaminergic neurons, as also  
396 indicated by biochemical analysis of serotonin striatal levels.

397 Despite its limited off-target editing [38], undesired targeting of SaCas9 on other genes cannot be  
398 fully excluded. Nevertheless, off-target candidates with up to 4 mismatches were screened in the  
399 whole genome of *Rattus norvegicus* (<http://www.rgenome.net/cas-offinder/>), consistently with  
400 past reports [40]. To the best of our knowledge, the off-target matches (*Ndrg1*, *RGD1305938*,  
401 *Btn2a2*, *AABR07042293.2*) have no effects on VMAT2 function, being involved in cell  
402 differentiation, T-cell regulation, and mRNA processing, respectively  
403 (<https://www.ncbi.nlm.nih.gov/IEB/Research/Acembly/index.html>).

404 Another limitation of the study is the relatively small sample size, related to the complex and high-  
405 cost procedures involved in the *in vivo* imaging measurements. In addition to this, the intrinsically  
406 high intersubject variability in rs-fMRI, and differences in knockdown efficiency contributed to  
407 significant variance in our cohorts. Nevertheless, the variability of gene-editing efficiency was in  
408 line with previous *in vivo* brain studies [40, 41].

409

## 410 **Conclusions**

411 This work encourages the combinatorial use of CRISPR/Cas9 and molecular and functional *in*  
412 *vivo* brain imaging to achieve selective modulation of genes and understand the related functional  
413 adaptations in brain networks, beyond the targeted circuitry.  
414 We anticipate our approach to be a starting point to shed the light on the function of specific  
415 genes and their encoded proteins on whole-brain connectivity, useful to understand the cellular  
416 basis of functional changes, identify early neurobiological markers, and promising therapeutic  
417 interventions.  
418

## 419 **Methods**

### 420 **Animals**

421 Female wild-type Long Evans rats ( $224 \pm 30$  g,  $n = 57$ ) (Charles River Laboratories, Sulzfeld,  
422 Germany) were kept on a 12 h day-night cycle at a room temperature of 22 °C and 40 - 60%  
423 humidity. Animals received a standard diet and tap water *ad libitum* before and during the  
424 experimental period. All animal experiments were performed according to the German Animal  
425 Welfare Act and were approved by the local ethical authorities, permit numbers R15/19M,  
426 R4/20G.

427

### 428 **Viral vectors**

429 SgRNAs targeting the second exon of the *Slc18a2* gene and the first exon of the *lacZ* gene were  
430 designed based on the PAM sequence of SaCas9 (NNGRRT) (Table 1). SgRNAs were cloned  
431 into an AAV-PHP.EB expression vector containing a GFP reporter sequence, driven by the CMV  
432 promoter, for the identification of transduced neurons. A second AAV-PHP.EB construct was  
433 produced to express SaCas9, flanked by two nuclear localization sequences (NLS) to allow its  
434 translocation into the nuclei. The vector expressed the nuclease via the CAG promoter and  
435 contains three HA-tags to visualize the targeted neurons (Fig. 1a). Cloning of the sgRNAs,  
436 plasmid construction, as well as the production of concentrated and purified AAV-PHP.EB  
437 vectors, delivered at a concentration of  $10^{13}$  gc/mL, were carried by SignaGen Laboratories  
438 (Frederick, Maryland, USA). A European patent application has been filed for the AAV-PHP.EB  
439 vectors and is currently pending.

440 The genomic mutation rate was assessed using a different set of AAVs with AAV2/1 serotype, for  
441 a conditional design, kindly provided by Matthias Heidenreich (prev. Zhang lab, Broad Institute of  
442 MIT and Harvard, Cambridge, USA).

443

#### 444 **Rat primary cortical neuron culture**

445 Primary cortical neurons were obtained from rat embryos of a pregnant Sprague Dawley rat from  
446 embryonic day 18 (E18) (Charles River, Sulzfeld, Germany). Embryos were decapitated and  
447 quickly removed from the mother rat. Cortical dissection was performed in ice-cold HBSS  
448 (100 mL 10 × HBSS, 870 mL dH<sub>2</sub>O, 3.3% 0.3 M HEPES pH 7.3 and 1% pen/strep)  
449 (LifeTechnologies, Massachusetts, USA). The obtained tissue was washed three times with  
450 10 mL ice-cold HBSS PhenolRed-free (LifeTechnologies, Massachusetts, USA) and then  
451 digested at 37 °C for 20 min in 8 mL HBSS with 2.5% trypsin (LifeTechnologies, Massachusetts,  
452 USA). Cortices were washed 3 times with 10 mL HBSS containing 3.7% FBS, and then gently  
453 triturated in 2 mL HBSS. For the maintenance, neurons were plated on poly-D-lysine-coated 24  
454 well plates (BD Biosciences, Heidelberg, Germany) or coverslips (Neuvitro Corporation,  
455 Vancouver, USA) at a density of  $16 \times 10^4$ /well, and cultured in Neurobasal media supplemented  
456 with 2% 1 × B27, 0.25% Glutamax, 0.125% Glutamate and 1% pen/strep (LifeTechnologies,  
457 Massachusetts, USA) for four days. Afterward, for the immunofluorescence, AAVs carrying the  
458 expression of the vectors for the SaCas9 and sgRNAs (1:1 ratio), were added to the culture  
459 medium at 200,000 MOI (AAV-PHP.EB-sgRNA-*lacZ*:  $1.7 \times 10^{12}$  gc/mL, AVV-PHP.EB-SaCas9:  
460  $1.4 \times 10^{12}$  gc/mL, AAV-PHP.EB-sgRNA-*Slc18a2*:  $2.1 \times 10^{12}$  gc/mL, final viral volume  
461 37.5 µL/well). For the Surveyor assay, conditional AAVs for SaCas9, sgRNA-*Slc18a2*, Cre-  
462 recombinase (AAV2/1, 1:1:0.5 ratio) were used. Neurons were processed 1-week post-viral  
463 treatment (Fig. 1b).

464

#### 465 **Surveyor assay**

466 To estimate the VMAT2 knockdown efficiency of the designed sgRNA *in vitro*, we evaluated the  
467 presence of genetic deletions in rat primary neurons with the Surveyor assay (Surveyor kit,  
468 Integrated DNA Technologies, Coralville, USA). One week following the viral infection, the

469 genomic DNA was extracted using the QuickExtract DNA Extraction solution (Epicentre,  
470 Madison, USA), according to the manufacturer's instructions, and was normalized to 100 ng in  
471 dH<sub>2</sub>O. 18 - 25 nt primers were designed 200 - 400 bp away from either side of the SaCas9 target  
472 site to amplify the loci of interest by touchdown PCR (oligonucleotides used for PCR are provided  
473 in Supplementary Table 8). DNA amplification was performed using 0.5 µL Phusion Polymerase  
474 (Life Technologies, Massachusetts, USA), as previously reported [106]. A single band product was  
475 visualized on 1.5% agarose gel, isolated, and purified using QIAquick Spin columns (Qiagen,  
476 Hilden, Germany), following the supplier's protocol. 400 ng of the purified PCR product were  
477 mixed with 2 µL Taq DNA polymerase buffer (Life Technologies, Massachusetts, USA) to allow  
478 the cross-annealing of the mutated and wild-type sequences. The re-annealing process was  
479 conducted at the following cycling conditions: 10 min at 95 °C, 95 °C to 85 °C at -2 °C/s, hold  
480 1 min, ramp down to 75 °C at -0.3 °C/s, hold 1 min, and so on until 25 °C temperature was  
481 reached. Samples were then stored at 4 °C. This cross-annealing procedure converts the  
482 mutations into mismatch duplexes (heteroduplexes), which can be recognized by performing  
483 nuclease digestion [107]. We digested the annealed products for 20 min at 42 °C using 2.5 µL  
484 MgCl<sub>2</sub> (0.15 M), 1 µL Surveyor nuclease, and 1 µL Surveyor enhancer. Digested products were  
485 then resolved on a 2.5% agarose gel, stained with 0.01% SYBR Gold DNA (Life Technologies,  
486 Massachusetts, USA) in 1% TBE buffer. The size of the occurring bands indicated the location of  
487 the mutation (expected DNA fragments sizes are provided in Supplementary Table 8). To  
488 quantify the knockdown efficiency, the software ImageJ was used. Peak areas of the bands  
489 visualized on agarose gel were selected and the percentages of the transduced neurons  
490 acquiring the InDel mutation were calculated using the following formula [106]:

$$Editing (\%) = 100 \times \left(1 - \sqrt{\left(1 - \frac{b + c}{a + b + c}\right)}\right)$$

491 where  $a$  is the integrated intensity of the undigested PCR product and  $b$  and  $c$  are the integrated  
492 intensities of each cleavage fragment from the digested product.

493

#### 494 **Immunofluorescence of rat primary neurons**

495 Rat primary neurons were processed 1-week post-AAV-transduction. Coverslips were washed  
496 twice with DPBS and fixed in 4% PFA in DPBS for 15 min at room temperature. Blocking and  
497 permeabilization were performed for 30 min in DPBS with 5% donkey serum, 0.5% Triton-X100,  
498 and 0.05% BSA. Primary antibody incubation (VMAT2, 1:50, EB06558, Everest Biotech,  
499 Ramona, USA, HA-tag: 1:50, 682404, Biolegend, San Diego, USA) was performed for 60 min,  
500 followed by Cy3 conjugated secondary antibody incubation (1:250, kindly provided from Birgit  
501 Fehrenbacher, Department of Dermatology, University of Tuebingen, Germany). Coverslips were  
502 mounted using ProLong Antifade Diamond Medium containing DAPI (Life Technologies,  
503 Massachusetts, USA), and imaged with a TCS-SP2/Leica DM IRE2 confocal laser scanning  
504 microscope. Images were processed with Leica Confocal Software LCS (Version 2.61) (original  
505 magnification 630) (Leica Microsystems, Wetzlar, Germany).

506

#### 507 **Study design of the *in vivo* experiments**

508 In a first cohort, AAVs-CRISPR/SaCas9 were stereotactically delivered into the right SNc of wild-  
509 type rats. Afterward, *in vivo* PET scans with imaging markers of VMAT2 expression, dopamine  
510 availability, nerve terminal integrity, and inflammatory responses were performed in VMAT2  
511 knockdown and control rats using [<sup>11</sup>C]DTBZ, [<sup>11</sup>C]raclopride, [<sup>11</sup>C]methylphenidate, and [<sup>18</sup>F]GE-  
512 180, respectively. Motor consequences of the CRISPR/SaCas9-induced VMAT2 knockdown  
513 were explored in a wide spectrum of behavioral tasks. Finally, biochemical and histological  
514 analyses were performed to corroborate the *in vivo* data (Fig. 2,3,4a).

515 In a second cohort, cylinder test and [<sup>11</sup>C]raclopride-PET/BOLD-fMRI scans were performed at  
516 baseline and after CRISPR/SaCas9-induced VMAT2 knockdown. These measurements were  
517 paralleled by *in vivo* PET scans with imaging markers of VMAT2 and GABA-A expression, to

518 inspect the extent of the induced VMAT2 knockdown and its impact on GABA signaling, using  
519 [<sup>11</sup>C]DTBZ and [<sup>11</sup>C]flumazenil, respectively (Fig. 5a).

520

### 521 **Stereotactic injections**

522 Rats were anesthetized by injecting a mixture (1 mL/kg) of fentanyl (0.005 mg/kg), midazolam  
523 (2 mg/kg,) and medetomidine (0.15 mg/kg) intraperitoneally, and were placed onto a stereotactic  
524 frame (Harvard Apparatus, Holliston, MA, USA) with the skull flat between Lambda and Bregma.

525 The following coordinates were used for the injections (flat skull position): AP: - 5 mm, ML:  
526  $\pm$  2 mm, DV: - 7.2 mm, below the dural surface as calculated relative to Bregma. Rats were  
527 injected with 3  $\mu$ L AAVs into the right SNc and were divided into two groups. Control rats (n= 10)  
528 were injected with AAV-PHP.EB-sgRNA-*lacZ* ( $1.7 \times 10^{12}$  gc/mL) and AVV-PHP.EB-SaCas9  
529 ( $1.4 \times 10^{12}$  gc/mL) (1:1 ratio). VMAT2 knockdown rats (n= 47) were injected with AAV-PHP.EB-  
530 sgRNA-*Slc18a2* ( $2.1 \times 10^{12}$  gc/mL) and AVV-PHP.EB-SaCas9 ( $1.4 \times 10^{12}$  gc/mL) (1:1 ratio) (see  
531 Fig. 1a for vector constructs). DPBS (3  $\mu$ L) was sham-injected into the contralateral SNc.

532 Solutions were infused at a rate of 0.2  $\mu$ L/min using a 5  $\mu$ L Hamilton syringe (Hamilton, Bonaduz,  
533 Switzerland) and an automated microsyringe pump (Harvard Apparatus, Holliston, MA, USA). To  
534 allow for the diffusion of AAVs into the tissue, the needle was left in place for 10 min, and then  
535 slowly retracted at 0.2 mm/min. After the surgery, an antidote containing atipamezole  
536 (0.75 mg/kg) and flumazenil (0.2 mg/kg) was injected subcutaneously. The rats were kept warm  
537 in their cages until fully recovered.

538

### 539 **Radiotracer synthesis**

540 [<sup>11</sup>C]CO<sub>2</sub> was produced on a medical cyclotron (PETtrace 860, GE Healthcare, Uppsala, Sweden)  
541 using the <sup>14</sup>N(p, $\alpha$ )<sup>11</sup>C route and converted to either [<sup>11</sup>C]MeI (methyl iodide) or [<sup>11</sup>C]MeOTf (methyl

542 triflate) using a Tracerlab FX MeI module (GE Healthcare). A Tracerlab FX M module (GE  
543 Healthcare) was used for automated methylation, purification, and formulation of the tracers.  
544 [<sup>11</sup>C]Dihydrotrabenzazine (DTBZ), a VMAT2 ligand, was synthesized starting from [<sup>11</sup>C]MeI,  
545 which was reacted with 1 mg (+)-9-O-desmethyl-dihydrotrabenzazine (ABX, Radeberg,  
546 Germany) in 300 µl DMF in the presence of 7.5 µl 5 M NaOH for 3 min at 40 °C [108]. Afterward,  
547 it was purified by HPLC and formulated as a sterile pyrogen-free saline solution. The total  
548 synthesis time from the end of the beam was 45 min. The radiochemical purity of the final  
549 radiotracer was > 95% as determined by HPLC. Molar activity at the time of injection was 96 ± 37  
550 GBq/µmol.

551 D-threo-[<sup>11</sup>C]methylphenidate, a dopamine transporter ligand, was synthesized by alkylation of D-  
552 threo-N-NPS-ritalinic acid (ABX) using [<sup>11</sup>C]MeI [109]. After acidic deprotection, purification, and  
553 formulation, the product was obtained with a 37 ± 6% decay-corrected radiochemical yield (from  
554 [<sup>11</sup>C]MeI). The total synthesis time was 55 min, and the radiochemical purity of the final  
555 formulated radiotracer was > 95% as determined by HPLC analysis. The molar activity was  
556 determined at the time of injection as 58 ± 14 GBq/µmol.

557 [<sup>11</sup>C]Raclopride a D2R ligand, was synthesized by alkylation of S-(+)-O-desmethyl-raclopride  
558 (ABX) using [<sup>11</sup>C]MeOTf. After purification and formulation, the product was obtained with a  
559 12 ± 4% decay-corrected radiochemical yield (from [<sup>11</sup>C]methyl triflate). The total synthesis time  
560 from the end of the beam was 55 min. The radiochemical purity of the final formulated radiotracer  
561 was > 95% as determined by HPLC. The molar activity was determined at the time of injection  
562 and was calculated as 88 ± 41 GBq/µmol.

563 [<sup>11</sup>C]Flumazenil, a GABA-A ligand, was synthesized by methylation of desmethylflumazenil (ABX)  
564 with [<sup>11</sup>C]MeI. 2 mg of the precursor were dissolved in 0.3 ml DMF with 3 µl 5 M NaOH and  
565 reacted for 2 min at 80 °C. After the reaction, the product was purified by semi-preparative HPLC



566 and reformulated by solid-phase extraction (Strata-X, Phenomenex; elution with 0.5 ml ethanol,  
567 dilution with 5 ml phosphate-buffered saline). The total synthesis time from the end of the beam  
568 was 50 min. The radiochemical purity of the final formulated radiotracer was > 95% as  
569 determined by HPLC. The molar activity was determined at the time of injection as  
570  $109.5 \pm 39.6$  GBq/ $\mu$ mol.

571 [ $^{18}$ F]Fluoride was produced on a PETtrace 860 medical cyclotron (GE Healthcare) using the  
572  $^{18}\text{O}(p,n)^{18}\text{F}$  route.

573 [ $^{18}$ F]GE-180, a translocator protein ligand [110], was synthesized on a FASTlab synthesizer (GE  
574 Healthcare) with precursor and reagent kits in single-use cassettes (GE Healthcare) according to  
575 the manufacturer's instructions. The radiochemical purity of the final formulated radiotracer was  
576 > 95% as determined by HPLC. The molar activity was determined at the time of injection as  
577  $576 \pm 283$  GBq/ $\mu$ mol.

578

### 579 ***In vivo* PET imaging and data analysis**

580 For the study of cohort 1, VMAT2 knockdown (n= 14) and control rats (n= 10) underwent 60 min  
581 dynamic PET emission scans with [ $^{11}$ C]DTBZ (8 – 10 weeks post-injection), [ $^{11}$ C]methylphenidate  
582 (10 – 12 weeks post-injection), [ $^{11}$ C]raclopride (12 – 14 weeks post-injection) and [ $^{18}$ F]GE-180  
583 (14 – 16 weeks post-injection) (Fig. 2a). Four rats were excluded from the data analyses because  
584 two rats from each group died during a PET acquisition. One control rat was excluded from the  
585 [ $^{11}$ C]methylphenidate analysis due to a poor signal-to-noise ratio.

586 For the study of cohort 2, VMAT2 knockdown rats (n= 33), underwent 60 min dynamic PET  
587 emission acquisitions with [ $^{11}$ C]DTBZ (8 – 10 weeks post-injection), and [ $^{11}$ C]flumazenil (10 –  
588 12 weeks post-injection). The final cohort included 23 rats (see paragraph Simultaneous  
589 PET/fMRI experiments).

590 Three small-animal PET scanners (Inveon, Siemens, Erlangen, Germany) and dedicated rat  
591 brain beds (Jomatik GmbH, Tuebingen, Germany) with stereotactic holders and temperature  
592 feedback control units (Medres, Cologne, Germany) were used. These ensured the delivery and  
593 removal of the anesthesia gas and stabilized the body temperature at 37 °C during the PET data  
594 acquisition. Anesthesia was induced by placing the animals in knock-out boxes and delivering 2%  
595 isoflurane in oxygen air. Subsequently, a 24 G catheter (BD Insite, NJ, USA) was placed into the  
596 tail vein for the tracer and/or *i.v.* anesthesia administration. Afterward, animals of cohort 1 were  
597 anesthetized with 2% isoflurane vaporized in 1.0 L/min of oxygen. Animals of cohort 2 received a  
598 medetomidine bolus injection (0.05 mg/kg) and the anesthesia was switched to constant  
599 medetomidine infusion (0.1 mg/kg/h), and 0.5% isoflurane in air during the scan time, as adapted  
600 from the literature [111].

601 The rats were placed in the center of the field of view and PET acquisitions started 5 s before the  
602 bolus injection of the tracer. In Supplementary Tables 9 and 10, injected activity (MBq/kg) and  
603 molar activity (GBq/ $\mu$ mol) at the time of injection are reported for each radioligand. The list-mode  
604 data from the dynamic acquisitions of [ $^{11}$ C]DTBZ, [ $^{11}$ C]raclopride, [ $^{11}$ C]methylphenidate, and  
605 [ $^{11}$ C]flumazenil were histogrammed into 39 time-frames (12x5 s, 6x10 s, 6x30 s, 5x60 s,  
606 10x300 s), from [ $^{18}$ F]GE-180 into 16 time-frames (5x60 s, 5x120 s, 3x300 s, 3x600 s). PET scans  
607 of the study cohort 1 were reconstructed using the OSEM3D map algorithm, and a matrix size of  
608 256 x 256 x 159, resulting in a pixel size of 0.38 x 0.38 x 0.79 mm. PET scans of the study cohort  
609 2 were reconstructed using the OSEM2D algorithm, and a matrix size of 256 x 256 x 89, resulting  
610 in a pixel size of 0.33 x 0.33 x 0.79 mm.

611 Data preprocessing analysis was performed with Matlab (Mathworks, Natick, MA, USA),  
612 Statistical Parametric Mapping 12 (SPM12, Wellcome Trust Centre for Neuroimaging, University  
613 College London, England), and the QModeling toolbox [112]. First, realignment of all frames was  
614 performed using SPM12 and average images were generated for every scan. The mean images  
615 were then used for coregistration to the Schiffer rat brain atlas provided by PMOD software [113].

616 To generate the respective time activity curves (TAC), volumes of interest (VOIs) were defined  
617 over the target and reference regions. VOIs were placed over the right and left striatum for  
618 [<sup>11</sup>C]DTBZ, [<sup>11</sup>C]raclopride, and [<sup>11</sup>C]methylphenidate, and over the regions reported in Table 2 for  
619 [<sup>11</sup>C]flumazenil. Cerebellum was used as reference region for [<sup>11</sup>C]DTBZ, [<sup>11</sup>C]raclopride and  
620 [<sup>11</sup>C]methylphenidate. Pons was used as reference region for [<sup>11</sup>C]flumazenil.

621 Binding potentials for [<sup>11</sup>C]DTBZ, [<sup>11</sup>C]raclopride, [<sup>11</sup>C]methylphenidate and [<sup>11</sup>C]flumazenil were  
622 calculated over the all frames in the regions of interest with Logan reference [114], with a  
623 population average k<sub>2</sub>' ([<sup>11</sup>C]DTBZ: 0.41 min<sup>-1</sup>, [<sup>11</sup>C]raclopride: 0.34 min<sup>-1</sup>, [<sup>11</sup>C]methylphenidate:  
624 0.18 min<sup>-1</sup>, [<sup>11</sup>C]flumazenil: 0.27 min<sup>-1</sup>). [<sup>11</sup>C]DTBZ and [<sup>11</sup>C]raclopride binding changes (%), here  
625 expressed as Δ binding, were calculated according to the formula:

$$\Delta \text{binding} = \frac{1 - \text{binding right striatum}}{\text{binding left striatum}} \times 100$$

626 [<sup>18</sup>F]GE-180 uptake in the right striatum was calculated over the interval between 30 – 60 min  
627 after scan start and normalized by the uptake calculated in the left (DPBS-injected) striatum over  
628 the same time interval.

629 QModeling was used to generate voxel-wise binding potential maps for [<sup>11</sup>C]DTBZ,  
630 [<sup>11</sup>C]raclopride, [<sup>11</sup>C]methylphenidate, and [<sup>11</sup>C]flumazenil. [<sup>18</sup>F]GE-180 average uptake images  
631 were generated with an in-house-written script in MATLAB.

632

### 633 **Simultaneous PET/fMRI experiments**

634 Rats (n= 33) underwent longitudinal simultaneous [<sup>11</sup>C]raclopride-PET/BOLD-fMRI scans at  
635 baseline and 8 – 14 weeks after CRISPR/SaCas9-induced VMAT2 knockdown. Three rats had to  
636 be excluded from the data analyses due to aliasing artifacts, local distortion, and motion during  
637 the data acquisition. Seven rats died during a PET/BOLD-fMRI scan. The final cohort included 23

638 rats. Anesthesia induction and injection were performed as described above for the cohort 2 (see  
639 paragraph *In vivo* PET imaging and data analysis).

640 Next, rats were placed onto a dedicated rat bed (Medres, Cologne, Germany) and a temperature  
641 feedback control unit (Medres, Cologne, Germany), ensuring the delivery and removal of the  
642 anesthesia gas and stabilizing the body temperature at 37 °C during the scan time. A breathing  
643 pad and a pulse oximeter were used to observe respiration and heart rates. Scans were acquired  
644 using a small-animal 7 T Clinscan MRI scanner, a 72 cm diameter linearly polarized RF coil  
645 (Bruker) for transmission, and a four-channel rat brain coil for reception (Bruker Biospin MRI,  
646 Ettlingen, Germany). Localizer scans were first acquired to accurately position the rat brains into  
647 the center of the PET/MRI field of view. Subsequently, local field homogeneity was optimized by  
648 measuring local magnetic field maps. Anatomical reference scans were performed using T2-  
649 weighted Turbo-RARE MRI sequences (TR: 1800 ms, TE: 67.11 ms, FOV: 40 x 32 x 32 mm,  
650 image size: 160 x 128 x 128 px, Rare factor: 28, averages: 1). Finally, T2\*-weighted gradient  
651 echo EPI sequences (TR: 2500 ms, TE: 18 ms, 0.25 mm isotropic resolution, FoV 25 x 23 mm,  
652 image size: 92 x 85 x 20 px, slice thickness 0.8 mm, slice separation 0.2 mm, 20 slices) were  
653 acquired for BOLD-fMRI.

654 A dedicated small-animal PET insert developed in cooperation with Bruker (Bruker Biospin MRI,  
655 Ettlingen, Germany) was used for the [<sup>11</sup>C]raclopride acquisitions, the second generation of a  
656 PET insert developed in-house with similar technical specifications [115]. [<sup>11</sup>C]Raclopride was  
657 applied via a bolus injection. In Supplementary Table 10 injected activities (MBq/kg) and molar  
658 activities (GBq/μmol) at the time of injection are reported. PET/fMRI acquisitions started  
659 simultaneously with the tracer injection and were performed over a period of 60 min. The list-  
660 mode files of the PET data were histogrammed into 14 time-frames (1x30 s, 5x60 s, 5x300 s,  
661 3x600 s), the 30s between acquisition start and the injection were excluded from the analysis.  
662 Reconstruction was performed with an in-house-written OSEM2D algorithm. Data preprocessing  
663 and analysis were performed as described above (see paragraph *In vivo* PET imaging and data

664 analysis). A population average  $k_2'$  ( $[^{11}\text{C}]\text{raclopride}$  baseline:  $0.20 \text{ min}^{-1}$ ,  $[^{11}\text{C}]\text{raclopride VMAT2}$   
665 knockdown:  $0.23 \text{ min}^{-1}$ ) was set for the Logan reference [114].

666 Preprocessing of the fMRI data was performed using a pipeline employing SPM12, Analysis of  
667 Functional NeuroImages (AFNI, National Institute of Mental Health (NIMH), Bethesda, Maryland,  
668 USA), and in-house-written scripts in MATLAB, as reported previously [22].

669 RS-FC was calculated using a seed-based approach. To this extent, 20 regions were selected  
670 from the Schiffer rat brain atlas (a list of the regions is provided in Table 2). The SPM toolbox  
671 Marseille Boîte À Région d'Intérêt (MarsBaR) was employed to extract fMRI time-courses from all  
672 regions [116]. These were then used to calculate pairwise Pearson's  $r$  correlation coefficients for  
673 each dataset, generating correlation matrices containing  $20 \times 20$  elements. Self-correlations were  
674 set to zero. The computed Pearson's  $r$  coefficients then underwent Fischer's transformation into  $z$   
675 values for group-level analysis.

676 Several rs-FC metrics were computed on different regional levels to investigate the potential  
677 effects of dopamine depletion in the right striatum. Regional node strengths were computed as  
678 the sum of all correlations of one seed to the regions included in one network. Interregional node  
679 strengths were defined as the sum of the correlations of one node to the regions of another  
680 network. Network strengths were defined as the sum of strengths of all correlations between  
681 regions belonging to a network. Internetwork strengths were calculated as the sum of all  
682 correlations between two sets of regions belonging to two networks [117].

683

## 684 **Behavioral analysis**

### 685 *Cylinder test*

686 Untrained rats were placed individually inside a glass cylinder (19 cm  $\varnothing$ , 20 cm height). The test  
687 started immediately and lasted 5 min. During the test session rats were left undisturbed and were  
688 videotaped with a camera located at the bottom-center of the cylinder to allow a  $360^\circ$  angle view.  
689 Paw touches were analyzed using a slow-motion video player (VLC software, VideoLan). The

690 number of wall touches, contacts with fully extended digits, was counted. Data were analyzed as  
691 follows:

$$\text{contralateral paw touches (\% to total)} = \frac{\text{contralateral touches}}{\text{total touches}} \times 100$$

692 One rat from the cohort 2 was excluded from the analysis due to issues during video recording.

693

#### 694 *Rotameter test*

695 Rotational asymmetry was assessed using an automated rotameter system composed of four  
696 hemispheres (TSE Systems GmbH, Bad Homburg, Germany) based on the design of Ungerstedt  
697 and Arbuthnott [118]. Rats were placed into an opaque half bowl (49 cm Ø; 44 cm height) and  
698 fixed to a moveable wire with a collar. The number of clockwise (CW) and counterclockwise  
699 (CCW) rotations (difference of 42.3° in their position) were automatically counted. The  
700 spontaneous rotation test lasted 5 min. Apomorphine-evoked rotational asymmetry was  
701 evaluated for 60 min after s.c. administration of apomorphine hydrochloride (0.25 mg/kg)  
702 dissolved in physiological saline containing 0.1% ascorbic acid (Sigma Aldrich, St. Louis,  
703 Missouri, USA). Two priming injections of apomorphine (1-week interval off-drug) were necessary  
704 to produce sensitization to the treatment. The program RotaMeter (TSE Systems GmbH, Bad  
705 Homburg, Germany) was used to acquire the data. Data were analyzed as follows:

$$\text{turns/min} = \text{ccw rotation} - \text{cw rotations}$$

706

#### 707 *Beam walk test*

708 Rats were trained for 4 days to cross a built-in-house beam (1.7 cm width, 60 cm length, 40 cm  
709 height), and reach a cage with environmental enrichment. Rats had 5 trials to cross the beam  
710 with the reward resting time decreasing from 30 s to 10 s. On the test day (one week apart from  
711 the fourth day of training), rats were videotaped. The acquired videos were analyzed using a

712 slow-motion video player (VLC software, VideoLan) and the number of footslips (falls) was  
713 counted. Data were analyzed as follows:

$$\text{contralateral footslips (\% to total steps)} = \frac{\text{contralateral footslips}}{\text{total steps}} \times 100$$

714

#### 715 *Open Field test*

716 Untrained rats were set in a rectangular box (TSE Systems GmbH, Bad Homburg, Germany) for  
717 11 min (1 min habituation, 10 min test) to evaluate the spontaneous exploratory behavior. A  
718 frame with light sensors, as high as the animals' body center, was connected to a receiver box to  
719 record the rats' walked distance. The program ActiMod (TSE Systems GmbH, Bad Homburg,  
720 Germany) was used for the analysis and the experimental session was divided into 1 min time  
721 bins. Results were averaged from the total traveled distance over 10 min (mean  $\pm$  SD).

722

#### 723 *Body weight gain*

724 Rats' body weight was measured before (week 0) and 14 weeks after CRISPR/SaCas9-induced  
725 VMAT2 knockdown. Body weight gain was calculated as follows:

$$\text{body weight gain (g)} = \frac{\text{weight at week 14} - \text{weight at week 0}}{\text{weight at week 0}} \times 100$$

726

#### 727 **Histology of rat brain slices**

728 Rats of cohort 1 (n= 20) were sacrificed 19 weeks after viral vector injection via CO<sub>2</sub> inhalation  
729 followed by intracardial perfusion with heparinized DPBS (1:50 v/v, 100 mL). After decapitation,  
730 brains were rapidly removed and placed in a brain matrix on ice. The left and right striata were  
731 dissected, from 2 mm thick coronal sections, flash-frozen in liquid nitrogen, and stored at  $-80^{\circ}\text{C}$   
732 until further analysis (HPLC). The remaining tissue was fixed in 4% paraformaldehyde for 48 h

733 and then transferred to a 20% sucrose solution for cryoprotection. Brains were cut into 35 µm  
734 thick coronal sections on a freezing microtome (Leica Biosystems, Wetzlar, Germany) and stored  
735 in an anti-freeze solution (0.5 M phosphate buffer, 30 % glycerol, 30 % ethylene glycol) at -  
736 20 °C. Sections were collected in 12 equally spaced series through the entire anterior-posterior  
737 extent of the SN and striatum and stored until further analysis. Immunohistochemistry was  
738 performed on free-floating sections. Sections were washed 3 times with TBS buffer and antigen  
739 retrieval was carried for 30 min at 80 °C in Tris/EDTA buffer. Afterward, pre-incubation in MeOH  
740 (10%) and H<sub>2</sub>O<sub>2</sub> (3%) in TBS was performed for 30 min. Following the blocking in 5% normal goat  
741 serum in TBS-X (0.05%), primary antibody incubation was performed for 24 h at room  
742 temperature in 1% BSA in TBS-X (TH: 1:5000, P40101, Pel-freez, Arkansas, USA, VMAT2:  
743 1:5000, 20042, Immunostar, Hudson, USA). The tissue was rinsed in TBS-X and reacted with the  
744 respective biotinylated secondary antibody (1:200, Vector Laboratories Ltd., Peterborough, UK)  
745 for 60 min at room temperature in 1% BSA in TBS-X. Staining was developed using 3,3'-  
746 diaminobenzidine (DAB Substrate Kit, Vector Laboratories Ltd., Peterborough, UK) and an  
747 immunoperoxidase system (Vectastain Elite ABC-Kit, Vector Laboratories Ltd., Peterborough,  
748 UK). Slices were rinsed, mounted onto chromalum gelatinized slides, dehydrated in ascending  
749 concentrations of alcohol and xylene baths, and coverslipped with DPX mounting medium (Sigma  
750 Aldrich, St. Louis, Missouri, USA).

751

## 752 **Stereological analysis**

753 Estimates of total numbers of TH+ cells in nigral sections were obtained with an unbiased  
754 stereological quantification method by employing the optical fractionator principle [119]. Brain  
755 sections from 5 rats (VMAT2 knockdown n= 2, Control n= 3) were excluded from the stereological  
756 analysis, due to weak TH immunoreactivity. First, 5x images were acquired with the automated  
757 Metafer slide scanning platform (MetaSystems, Altlußheim, Germany). Then, ROIs were drawn  
758 using the VSViewer program (Metasystems, Altlußheim, Germany), and a sampling fraction of



759 50% was defined. Afterward, 63x images were acquired in an automated fashion based on the  
760 sampling fraction in a random orientation within the ROI. The acquired 63x images were imported  
761 into the VIS program and cell counting was performed with the CAST module (Visiopharm A/S,  
762 Hørsholm, Denmark, Version 2020.08.2.8800).

763 The number of cells estimates was obtained by applying the formula:

$$Total\ number\ of\ TH +\ cells = \sum \left( \frac{Number\ of\ cells\ counted\ per\ brain}{Acquisition\ fraction\ x\ counting\ frame} \right) \times number\ of\ series$$

764

### 765 **Immunofluorescence of rat brain slices**

766 Immunofluorescence was performed on SN sections from rats of cohort 1 (35 µm thick coronal  
767 sections), mounted onto chromalum gelatinized slides, dehydrated in ascending concentrations of  
768 alcohol and xylene baths. Sections were washed 3 times with KPBS buffer and antigen retrieval  
769 was carried for 30 min at 80 °C in Tris/EDTA buffer. Following blocking in 5% donkey serum and  
770 normal horse serum in KPBS-X (0.25%), primary antibody incubation was performed for 24 h at  
771 room temperature (VMAT2: 1:5000, 20042, Immunostar, Hudson, USA, HA-tag: 1:5000, MMS-  
772 101R, Nordic BioSite, Taby, Sweden, GFP: 1:50.000, ab13970, Abcam, Cambridge, UK). The  
773 tissue was rinsed in KPBS-X and reacted with the respective fluorophore-conjugated secondary  
774 antibody (1:200, Vector Laboratories Ltd., Peterborough, UK) for 2 h in 0.2% KPBS-X. Slides  
775 were coverslipped with Vectashield mounting medium (Vector Laboratories Ltd., Peterborough,  
776 UK).

777

### 778 **Biochemistry**

779 Dopamine, 3,4-Dihydroxyphenylacetic acid (DOPAC), homovanillic acid (HVA), and serotonin (5-  
780 HT) striatal levels were determined by HPLC. Brain samples from 5 rats (VMAT2 knockdown

781 n= 3, Control n= 2) were excluded from the analysis as striatal sections did not fall in the selected  
782 range: 1.2 – 0.4 mm.

783 Briefly, striatal brain lysates generated from cohort 1 were injected by a cooled autosampler into  
784 an ESA Coulchem III coupled to a Decade Elite electrochemical detector (Antec Scientific,  
785 Zoeterwoude, The Netherlands) set to a potential of +350 mV. Separation was facilitated by using  
786 an Atlantis Premier BEH C18 AX column (Waters Corporation, Massachusetts, USA) and a dual  
787 mobile phase gradient of decreasing octane sulfonic acid (OSA) and increasing MeOH content  
788 (mobile phase A containing 100 mM PO<sub>4</sub>-buffer pH 2.50 and 4.62 mM OSA and mobile phase B  
789 containing 100 mM PO<sub>4</sub>-buffer pH 2.50 and 2.31 mM OSA), delivered at a flow rate of  
790 0.35 mL/min to an Atlantis Premier BEH C18 column (particle size 2.5 µm, 2.1 mm x 150 mm)  
791 (Waters Corporation, Massachusetts, USA). Data was collected using the Chemstation software  
792 (Agilent, California, USA) and then exported to Chromeleon (LifeTechnologies, Massachusetts,  
793 USA) for data quality control, peak integration, and concentration calculations. Striatal  
794 metabolites' content was expressed in nmol for each sample and normalized to total protein (mg).  
795 Dopamine turnover rate was calculated according to the formula:

$$\text{Dopamine turnover rate} = \frac{HVA + DOPAC}{DA}$$

796

## 797 **Statistics**

798 Statistical analysis was performed with GraphPad Prism 9.0 (Graphpad Software) if not otherwise  
799 stated. Results were analyzed using paired t-tests for the within-subjects comparisons, and  
800 unpaired t-tests for the between-groups comparisons. Correlations were performed using linear  
801 regression analyses. Synaptic dysfunction discrimination was tested with multiple-comparison  
802 ANOVA.

803

## 804 Bibliography

- 805 1. Biswal, B., et al., *Functional connectivity in the motor cortex of resting human brain using echo-*  
806 *planar MRI*. Magn Reson Med, 1995. **34**(4): p. 537-41.
- 807 2. Ogawa, S., et al., *Brain magnetic resonance imaging with contrast dependent on blood*  
808 *oxygenation*. Proc Natl Acad Sci U S A, 1990. **87**(24): p. 9868-72.
- 809 3. Lu, H., et al., *Rat brains also have a default mode network*. Proc Natl Acad Sci U S A, 2012.  
810 **109**(10): p. 3979-84.
- 811 4. Becerra, L., et al., *Robust reproducible resting state networks in the awake rodent brain*. PLoS  
812 One, 2011. **6**(10): p. e25701.
- 813 5. Fox, M.D., et al., *The human brain is intrinsically organized into dynamic, anticorrelated functional*  
814 *networks*. Proc Natl Acad Sci U S A, 2005. **102**(27): p. 9673-8.
- 815 6. Jonckers, E., et al., *Functional connectivity fMRI of the rodent brain: comparison of functional*  
816 *connectivity networks in rat and mouse*. PLoS One, 2011. **6**(4): p. e18876.
- 817 7. Wehrl, H.F., et al., *Simultaneous PET-MRI reveals brain function in activated and resting state on*  
818 *metabolic, hemodynamic and multiple temporal scales*. Nat Med, 2013. **19**(9): p. 1184-9.
- 819 8. Amend, M., et al., *Functional resting-state brain connectivity is accompanied by dynamic*  
820 *correlations of application-dependent [(18)F]FDG PET-tracer fluctuations*. Neuroimage, 2019. **196**:  
821 p. 161-172.
- 822 9. Ionescu, T.M., et al., *Elucidating the complementarity of resting-state networks derived from*  
823 *dynamic [(18)F]FDG and hemodynamic fluctuations using simultaneous small-animal PET/MRI*.  
824 Neuroimage, 2021. **236**: p. 118045.
- 825 10. Badhwar, A., et al., *Resting-state network dysfunction in Alzheimer's disease: A systematic review*  
826 *and meta-analysis*. Alzheimers Dement (Amst), 2017. **8**: p. 73-85.
- 827 11. Bluhm, R.L., et al., *Spontaneous low-frequency fluctuations in the BOLD signal in schizophrenic*  
828 *patients: anomalies in the default network*. Schizophr Bull, 2007. **33**(4): p. 1004-12.
- 829 12. Volkow, N.D., et al., *Imaging endogenous dopamine competition with [11C]raclopride in the*  
830 *human brain*. Synapse, 1994. **16**(4): p. 255-62.
- 831 13. Laruelle, M., *Imaging synaptic neurotransmission with in vivo binding competition techniques: a*  
832 *critical review*. J Cereb Blood Flow Metab, 2000. **20**(3): p. 423-51.
- 833 14. Patel, V.D., et al., *Imaging dopamine release with Positron Emission Tomography (PET) and (11)C-*  
834 *raclopride in freely moving animals*. Neuroimage, 2008. **41**(3): p. 1051-66.
- 835 15. Roffman, J.L., et al., *Dopamine D1 signaling organizes network dynamics underlying working*  
836 *memory*. Science advances, 2016. **2**(6): p. e1501672-e1501672.
- 837 16. McCutcheon, R.A., et al., *Mesolimbic Dopamine Function Is Related to Salience Network*  
838 *Connectivity: An Integrative Positron Emission Tomography and Magnetic Resonance Study*. Biol  
839 Psychiatry, 2019. **85**(5): p. 368-378.
- 840 17. Nagano-Saito, A., et al., *Posterior dopamine D2/3 receptors and brain network functional*  
841 *connectivity*. Synapse, 2017. **71**(11).
- 842 18. Hahn, A., et al., *Differential modulation of the default mode network via serotonin-1A receptors*.  
843 Proc Natl Acad Sci U S A, 2012. **109**(7): p. 2619-24.
- 844 19. Vidal, B., et al., *In vivo biased agonism at 5-HT(1A) receptors: characterisation by simultaneous*  
845 *PET/MR imaging*. Neuropsychopharmacology, 2018. **43**(11): p. 2310-2319.
- 846 20. Shiyam Sundar, L.K., et al., *Fully Integrated PET/MR Imaging for the Assessment of the*  
847 *Relationship Between Functional Connectivity and Glucose Metabolic Rate*. Front Neurosci, 2020.  
848 **14**: p. 252.
- 849 21. Sander, C.Y., et al., *Imaging Agonist-Induced D2/D3 Receptor Desensitization and Internalization*  
850 *In Vivo with PET/fMRI*. Neuropsychopharmacology, 2016. **41**(5): p. 1427-36.

- 851 22. Ionescu, T., *Striatal and prefrontal D2R and SERT distributions contrastingly correlate with default-*  
852 *mode connectivity*. 2021.
- 853 23. Betley, J.N. and S.M. Sternson, *Adeno-associated viral vectors for mapping, monitoring, and*  
854 *manipulating neural circuits*. Hum Gene Ther, 2011. **22**(6): p. 669-77.
- 855 24. Jinek, M., et al., *RNA-programmed genome editing in human cells*. Elife, 2013. **2**: p. e00471.
- 856 25. Cong, L., et al., *Multiplex genome engineering using CRISPR/Cas systems*. Science, 2013.  
857 **339**(6121): p. 819-23.
- 858 26. Whitworth, K.M., et al., *Use of the CRISPR/Cas9 system to produce genetically engineered pigs*  
859 *from in vitro-derived oocytes and embryos*. Biol Reprod, 2014. **91**(3): p. 78.
- 860 27. Chen, Y., et al., *Functional disruption of the dystrophin gene in rhesus monkey using CRISPR/Cas9*.  
861 Hum Mol Genet, 2015. **24**(13): p. 3764-74.
- 862 28. Chang, N., et al., *Genome editing with RNA-guided Cas9 nuclease in zebrafish embryos*. Cell Res,  
863 2013. **23**(4): p. 465-72.
- 864 29. Platt, R.J., et al., *CRISPR-Cas9 knockin mice for genome editing and cancer modeling*. Cell, 2014.  
865 **159**(2): p. 440-55.
- 866 30. Yu, Z., et al., *Highly efficient genome modifications mediated by CRISPR/Cas9 in Drosophila*.  
867 Genetics, 2013. **195**(1): p. 289-91.
- 868 31. Musunuru, K., et al., *In vivo CRISPR base editing of PCSK9 durably lowers cholesterol in primates*.  
869 Nature, 2021. **593**(7859): p. 429-434.
- 870 32. Ousterout, D.G., et al., *Multiplex CRISPR/Cas9-based genome editing for correction of dystrophin*  
871 *mutations that cause Duchenne muscular dystrophy*. Nat Commun, 2015. **6**: p. 6244.
- 872 33. Swiech, L., et al., *In vivo interrogation of gene function in the mammalian brain using CRISPR-*  
873 *Cas9*. Nature Biotechnology, 2015. **33**(1): p. 102-U286.
- 874 34. Wilbie, D., J. Walther, and E. Mastrobattista, *Delivery Aspects of CRISPR/Cas for in Vivo Genome*  
875 *Editing*. Accounts of chemical research, 2019. **52**(6): p. 1555-1564.
- 876 35. Wu, W.Y., et al., *Genome editing by natural and engineered CRISPR-associated nucleases*. Nat  
877 Chem Biol, 2018. **14**(7): p. 642-651.
- 878 36. Zetsche, B., et al., *Cpf1 is a single RNA-guided endonuclease of a class 2 CRISPR-Cas system*. Cell,  
879 2015. **163**(3): p. 759-71.
- 880 37. Kleinstiver, B.P., et al., *Engineered CRISPR-Cas9 nucleases with altered PAM specificities*. Nature,  
881 2015. **523**(7561): p. 481-5.
- 882 38. Ran, F.A., et al., *In vivo genome editing using Staphylococcus aureus Cas9*. Nature, 2015.  
883 **520**(7546): p. 186-91.
- 884 39. Nishimasu, H., et al., *Crystal Structure of Staphylococcus aureus Cas9*. Cell, 2015. **162**(5): p. 1113-  
885 26.
- 886 40. Sun, H., et al., *Development of a CRISPR-SaCas9 system for projection- and function-specific gene*  
887 *editing in the rat brain*. Sci Adv, 2020. **6**(12): p. eaay6687.
- 888 41. Kumar, N., et al., *The Development of an AAV-Based CRISPR SaCas9 Genome Editing System That*  
889 *Can Be Delivered to Neurons in vivo and Regulated via Doxycycline and Cre-Recombinase*. Front  
890 Mol Neurosci, 2018. **11**: p. 413.
- 891 42. Hunker, A.C., et al., *Conditional Single Vector CRISPR/SaCas9 Viruses for Efficient Mutagenesis in*  
892 *the Adult Mouse Nervous System*. Cell Rep, 2020. **30**(12): p. 4303-4316 e6.
- 893 43. Liu, Y. and R.H. Edwards, *The role of vesicular transport proteins in synaptic transmission and*  
894 *neural degeneration*. Annu Rev Neurosci, 1997. **20**: p. 125-56.
- 895 44. Miyanishi, K., et al., *Behavioral tests predicting striatal dopamine level in a rat hemi-Parkinson's*  
896 *disease model*. Neurochem Int, 2019. **122**: p. 38-46.
- 897 45. Tomasi, D., et al., *Dopamine transporters in striatum correlate with deactivation in the default*  
898 *mode network during visuospatial attention*. PLoS One, 2009. **4**(6): p. e6102.

- 899 46. Sambataro, F., et al., *DRD2 genotype-based variation of default mode network activity and of its*  
900 *relationship with striatal DAT binding*. Schizophr Bull, 2013. **39**(1): p. 206-16.
- 901 47. Tritsch, N.X., J.B. Ding, and B.L. Sabatini, *Dopaminergic neurons inhibit striatal output through*  
902 *non-canonical release of GABA*. Nature, 2012. **490**(7419): p. 262-6.
- 903 48. Tritsch, N.X., et al., *Midbrain dopamine neurons sustain inhibitory transmission using plasma*  
904 *membrane uptake of GABA, not synthesis*. Elife, 2014. **3**: p. e01936.
- 905 49. Chatterjee, D., et al., *Enhanced CNS transduction from AAV.PHP.eB infusion into the cisterna*  
906 *magna of older adult rats compared to AAV9*. Gene Ther, 2021.
- 907 50. Hume, S.P., et al., *Effect of L-dopa and 6-hydroxydopamine lesioning on [11C]raclopride binding in*  
908 *rat striatum, quantified using PET*. Synapse, 1995. **21**(1): p. 45-53.
- 909 51. Mishra, R.K., A.M. Marshall, and S.L. Varmuza, *Supersensitivity in rat caudate nucleus: effects of 6-*  
910 *hydroxydopamine on the time course of dopamine receptor and cyclic AMP changes*. Brain Res,  
911 1980. **200**(1): p. 47-57.
- 912 52. Creese, I., D.R. Burt, and S.H. Snyder, *Dopamine receptor binding enhancement accompanies*  
913 *lesion-induced behavioral supersensitivity*. Science, 1977. **197**(4303): p. 596-8.
- 914 53. Konieczny, J., et al., *The significance of rotational behavior and sensitivity of striatal dopamine*  
915 *receptors in hemiparkinsonian rats: A comparative study of lactacystin and 6-OHDA*.  
916 Neuroscience, 2017. **340**: p. 308-318.
- 917 54. Wang, Y.M., et al., *Knockout of the vesicular monoamine transporter 2 gene results in neonatal*  
918 *death and supersensitivity to cocaine and amphetamine*. Neuron, 1997. **19**(6): p. 1285-96.
- 919 55. Seeman, P., et al., *Dopamine receptors in the central nervous system*. Fed Proc, 1978. **37**(2): p.  
920 131-6.
- 921 56. Gnanalingham, K.K. and R.G. Robertson, *The effects of chronic continuous versus intermittent*  
922 *levodopa treatments on striatal and extrastriatal D1 and D2 dopamine receptors and dopamine*  
923 *uptake sites in the 6-hydroxydopamine lesioned rat--an autoradiographic study*. Brain Res, 1994.  
924 **640**(1-2): p. 185-94.
- 925 57. Graham, W.C., A.R. Crossman, and G.N. Woodruff, *Autoradiographic studies in animal models of*  
926 *hemi-parkinsonism reveal dopamine D2 but not D1 receptor supersensitivity. I. 6-OHDA lesions of*  
927 *ascending mesencephalic dopaminergic pathways in the rat*. Brain Res, 1990. **514**(1): p. 93-102.
- 928 58. Antonini, A., et al., *Long-term changes of striatal dopamine D2 receptors in patients with*  
929 *Parkinson's disease: a study with positron emission tomography and [11C]raclopride*. Mov Disord,  
930 1997. **12**(1): p. 33-8.
- 931 59. Kraemmer, J., et al., *Correlation of striatal dopamine transporter imaging with post mortem*  
932 *substantia nigra cell counts*. Mov Disord, 2014. **29**(14): p. 1767-73.
- 933 60. Sossi, V., et al., *Dopamine transporter relation to levodopa-derived synaptic dopamine in a rat*  
934 *model of Parkinson's: an in vivo imaging study*. J Neurochem, 2009. **109**(1): p. 85-92.
- 935 61. Zigmond, M.J., T.G. Hastings, and R.G. Perez, *Increased dopamine turnover after partial loss of*  
936 *dopaminergic neurons: compensation or toxicity?* Parkinsonism Relat Disord, 2002. **8**(6): p. 389-  
937 93.
- 938 62. Takahashi, N., et al., *VMAT2 knockout mice: heterozygotes display reduced amphetamine-*  
939 *conditioned reward, enhanced amphetamine locomotion, and enhanced MPTP toxicity*. Proc Natl  
940 Acad Sci U S A, 1997. **94**(18): p. 9938-43.
- 941 63. Fon, E.A., et al., *Vesicular transport regulates monoamine storage and release but is not essential*  
942 *for amphetamine action*. Neuron, 1997. **19**(6): p. 1271-83.
- 943 64. Mooslehner, K.A., et al., *Mice with very low expression of the vesicular monoamine transporter 2*  
944 *gene survive into adulthood: potential mouse model for parkinsonism*. Mol Cell Biol, 2001. **21**(16):  
945 p. 5321-31.
- 946 65. Caudle, W.M., et al., *Reduced vesicular storage of dopamine causes progressive nigrostriatal*  
947 *neurodegeneration*. J Neurosci, 2007. **27**(30): p. 8138-48.

- 948 66. Taylor, T.N., et al., *Nonmotor symptoms of Parkinson's disease revealed in an animal model with*  
949 *reduced monoamine storage capacity*. J Neurosci, 2009. **29**(25): p. 8103-13.
- 950 67. Back, S., et al., *Neuron-Specific Genome Modification in the Adult Rat Brain Using CRISPR-Cas9*  
951 *Transgenic Rats*. Neuron, 2019.
- 952 68. Zimmer, E.R., et al., *MicroPET imaging and transgenic models: a blueprint for Alzheimer's disease*  
953 *clinical research*. Trends Neurosci, 2014. **37**(11): p. 629-41.
- 954 69. Andrews-Hanna, J.R., *The brain's default network and its adaptive role in internal mentation*.  
955 Neuroscientist, 2012. **18**(3): p. 251-70.
- 956 70. Gottlich, M., et al., *Altered resting state brain networks in Parkinson's disease*. PLoS One, 2013.  
957 **8**(10): p. e77336.
- 958 71. Huang, S., et al., *Multisensory Competition Is Modulated by Sensory Pathway Interactions with*  
959 *Fronto-Sensorimotor and Default-Mode Network Regions*. J Neurosci, 2015. **35**(24): p. 9064-77.
- 960 72. Wu, C.W., et al., *Synchrony Between Default-Mode and Sensorimotor Networks Facilitates Motor*  
961 *Function in Stroke Rehabilitation: A Pilot fMRI Study*. Front Neurosci, 2020. **14**: p. 548.
- 962 73. Wang, J., et al., *Functional reorganization of intra- and internetwork connectivity in major*  
963 *depressive disorder after electroconvulsive therapy*. Hum Brain Mapp, 2018. **39**(3): p. 1403-1411.
- 964 74. Perlberg, V., et al., *Alterations of the nigrostriatal pathway in a 6-OHDA rat model of Parkinson's*  
965 *disease evaluated with multimodal MRI*. PLoS One, 2018. **13**(9): p. e0202597.
- 966 75. Monnot, C., et al., *Asymmetric dopaminergic degeneration and levodopa alter functional*  
967 *cortico-striatal connectivity bilaterally in experimental parkinsonism*. Exp Neurol, 2017. **292**: p. 11-  
968 20.
- 969 76. Honey, G.D., et al., *Dopaminergic drug effects on physiological connectivity in a human cortico-*  
970 *striato-thalamic system*. Brain, 2003. **126**(Pt 8): p. 1767-81.
- 971 77. Kwak, Y., et al., *Altered resting state cortico-striatal connectivity in mild to moderate stage*  
972 *Parkinson's disease*. Front Syst Neurosci, 2010. **4**: p. 143.
- 973 78. Costa, R.M., et al., *Rapid alterations in cortico-striatal ensemble coordination during acute*  
974 *dopamine-dependent motor dysfunction*. Neuron, 2006. **52**(2): p. 359-69.
- 975 79. Gatev, P., O. Darbin, and T. Wichmann, *Oscillations in the basal ganglia under normal conditions*  
976 *and in movement disorders*. Mov Disord, 2006. **21**(10): p. 1566-77.
- 977 80. Hammond, C., H. Bergman, and P. Brown, *Pathological synchronization in Parkinson's disease:*  
978 *networks, models and treatments*. Trends Neurosci, 2007. **30**(7): p. 357-64.
- 979 81. Eusebio, A., et al., *Resonance in subthalamo-cortical circuits in Parkinson's disease*. Brain, 2009.  
980 **132**(Pt 8): p. 2139-50.
- 981 82. Brazhnik, E., et al., *State-dependent spike and local field synchronization between motor cortex*  
982 *and substantia nigra in hemiparkinsonian rats*. J Neurosci, 2012. **32**(23): p. 7869-80.
- 983 83. Moran, R.J., et al., *Alterations in brain connectivity underlying beta oscillations in Parkinsonism*.  
984 PLoS Comput Biol, 2011. **7**(8): p. e1002124.
- 985 84. Gerfen, C.R. and D.J. Surmeier, *Modulation of striatal projection systems by dopamine*. Annu Rev  
986 Neurosci, 2011. **34**: p. 441-66.
- 987 85. Caspers, J., et al., *Differential Functional Connectivity Alterations of Two Subdivisions within the*  
988 *Right dIPFC in Parkinson's Disease*. Front Hum Neurosci, 2017. **11**: p. 288.
- 989 86. Owens-Walton, C., et al., *Increased functional connectivity of thalamic subdivisions in patients*  
990 *with Parkinson's disease*. PLoS One, 2019. **14**(9): p. e0222002.
- 991 87. Kahn, I., et al., *Distinct cortical anatomy linked to subregions of the medial temporal lobe revealed*  
992 *by intrinsic functional connectivity*. J Neurophysiol, 2008. **100**(1): p. 129-39.
- 993 88. Vincent, J.L., et al., *Coherent spontaneous activity identifies a hippocampal-parietal memory*  
994 *network*. J Neurophysiol, 2006. **96**(6): p. 3517-31.
- 995 89. Hillary, F.G., et al., *Hyperconnectivity is a fundamental response to neurological disruption*.  
996 Neuropsychology, 2015. **29**(1): p. 59-75.

- 997 90. Klobusiakova, P., et al., *Connectivity Between Brain Networks Dynamically Reflects Cognitive*  
998 *Status of Parkinson's Disease: A Longitudinal Study*. J Alzheimers Dis, 2019. **67**(3): p. 971-984.
- 999 91. Mevel, K., et al., *The default mode network in healthy aging and Alzheimer's disease*. Int J  
1000 Alzheimers Dis, 2011. **2011**: p. 535816.
- 1001 92. Gorges, M., et al., *To rise and to fall: functional connectivity in cognitively normal and cognitively*  
1002 *impaired patients with Parkinson's disease*. Neurobiol Aging, 2015. **36**(4): p. 1727-1735.
- 1003 93. Helmich, R.C., et al., *Spatial remapping of cortico-striatal connectivity in Parkinson's disease*.  
1004 Cereb Cortex, 2010. **20**(5): p. 1175-86.
- 1005 94. O'Gorman Tuura, R.L., C.R. Baumann, and H. Baumann-Vogel, *Beyond Dopamine: GABA,*  
1006 *Glutamate, and the Axial Symptoms of Parkinson Disease*. Front Neurol, 2018. **9**: p. 806.
- 1007 95. Whiting, P.J., *The GABAA receptor gene family: new opportunities for drug development*. Curr  
1008 Opin Drug Discov Devel, 2003. **6**(5): p. 648-57.
- 1009 96. Kapogiannis, D., et al., *Posteromedial cortex glutamate and GABA predict intrinsic functional*  
1010 *connectivity of the default mode network*. Neuroimage, 2013. **64**: p. 112-9.
- 1011 97. Douaud, G., et al., *Integration of structural and functional magnetic resonance imaging in*  
1012 *amyotrophic lateral sclerosis*. Brain, 2011. **134**(Pt 12): p. 3470-9.
- 1013 98. Levar, N., et al., *Anterior cingulate GABA and glutamate concentrations are associated with*  
1014 *resting-state network connectivity*. Sci Rep, 2019. **9**(1): p. 2116.
- 1015 99. Lanoue, A.C., G.J. Blatt, and J.J. Soghomonian, *Decreased parvalbumin mRNA expression in*  
1016 *dorsolateral prefrontal cortex in Parkinson's disease*. Brain Res, 2013. **1531**: p. 37-47.
- 1017 100. Lanoue, A.C., et al., *Decreased glutamic acid decarboxylase mRNA expression in prefrontal cortex*  
1018 *in Parkinson's disease*. Exp Neurol, 2010. **226**(1): p. 207-17.
- 1019 101. Ihara, M., et al., *Association of vascular parkinsonism with impaired neuronal integrity in the*  
1020 *striatum*. J Neural Transm (Vienna), 2007. **114**(5): p. 577-84.
- 1021 102. van Nuland, A.J.M., et al., *GABAergic changes in the thalamocortical circuit in Parkinson's disease*.  
1022 Hum Brain Mapp, 2020. **41**(4): p. 1017-1029.
- 1023 103. Allen, P., et al., *Extrinsic and default mode networks in psychiatric conditions: Relationship to*  
1024 *excitatory-inhibitory transmitter balance and early trauma*. Neurosci Biobehav Rev, 2019. **99**: p.  
1025 90-100.
- 1026 104. Liu, Z., et al., *Tissue Specific Expression of Cre in Rat Tyrosine Hydroxylase and Dopamine Active*  
1027 *Transporter-Positive Neurons*. PLoS One, 2016. **11**(2): p. e0149379.
- 1028 105. Anders Björklund, S.B.D., *Dopamine neuron systems in the brain: an update*. Trends in  
1029 Neuroscience, 2007. **30**(5): p. 194-202.
- 1030 106. Ran, F.A., et al., *Genome engineering using the CRISPR-Cas9 system*. Nat Protoc, 2013. **8**(11): p.  
1031 2281-2308.
- 1032 107. Vouillot, L., A. Thelie, and N. Pollet, *Comparison of T7E1 and surveyor mismatch cleavage assays*  
1033 *to detect mutations triggered by engineered nucleases*. G3 (Bethesda), 2015. **5**(3): p. 407-15.
- 1034 108. Huang, Z.R., et al., *A Novel Potential Positron Emission Tomography Imaging Agent for Vesicular*  
1035 *Monoamine Transporter Type 2*. PLoS One, 2016. **11**(9): p. e0161295.
- 1036 109. Ding, Y.S., et al., *Pharmacokinetics and in vivo specificity of [11C]dl-threo-methylphenidate for the*  
1037 *presynaptic dopaminergic neuron*. Synapse, 1994. **18**(2): p. 152-60.
- 1038 110. Wadsworth, H., et al., *[(1)(8)F]GE-180: a novel fluorine-18 labelled PET tracer for imaging*  
1039 *Translocator protein 18 kDa (TSPO)*. Bioorg Med Chem Lett, 2012. **22**(3): p. 1308-13.
- 1040 111. Paasonen, J., et al., *Functional connectivity under six anesthesia protocols and the awake*  
1041 *condition in rat brain*. Neuroimage, 2018. **172**: p. 9-20.
- 1042 112. Lopez-Gonzalez, F.J., et al., *QModeling: a Multiplatform, Easy-to-Use and Open-Source Toolbox for*  
1043 *PET Kinetic Analysis*. Neuroinformatics, 2019. **17**(1): p. 103-114.
- 1044 113. Schiffer, W.K., et al., *Serial microPET measures of the metabolic reaction to a microdialysis probe*  
1045 *implant*. J Neurosci Methods, 2006. **155**(2): p. 272-84.

1046 114. Logan, J., *Graphical analysis of PET data applied to reversible and irreversible tracers*. Nucl Med  
1047 Biol, 2000. **27**(7): p. 661-70.

1048 115. Judenhofer, M.S., et al., *Simultaneous PET-MRI: a new approach for functional and morphological*  
1049 *imaging*. Nat Med, 2008. **14**(4): p. 459-65.

1050 116. Matthew Brett, J.-L.A., Romain Valabregue, Jean-Baptiste Poline, *Region of interest analysis using*  
1051 *an SPM toolbox*, in *8th International Conference on Functional Mapping of the Human Brain*. June 2-  
1052 6, 2002: Sendai, Japan.

1053 117. Rubinov, M. and O. Sporns, *Complex network measures of brain connectivity: uses and*  
1054 *interpretations*. Neuroimage, 2010. **52**(3): p. 1059-69.

1055 118. Ungerstedt, U. and G.W. Arbuthnott, *Quantitative recording of rotational behavior in rats after 6-*  
1056 *hydroxy-dopamine lesions of the nigrostriatal dopamine system*. Brain Res, 1970. **24**(3): p. 485-93.

1057 119. West, M.J., *Stereological methods for estimating the total number of neurons and synapses: issues*  
1058 *of precision and bias*. Trends Neurosci, 1999. **22**(2): p. 51-61.

1059

1060



1061 **Acknowledgments**

1062 We are very grateful to Feng Zhang and all members of the laboratory, Broad Institute of MIT and  
1063 Harvard, for the help and support with establishing the CRISPR gene knockdown experiments.  
1064 We thank the technical assistants Sandro Aidone, Daniel Bukala, Linda Schramm, Maren Harant,  
1065 Ramona Stremme, Elena Kimmerle and Johannes Kinzler. We also thank Ulla Samuelsson,  
1066 Ulrika Sparrhult-Björk, Dr. Ulrika Schagerlöf, Anneli Josefsson and Anna Hansen at Lund  
1067 University, Sweden for their technical support. Additionally, we acknowledge Dr. Julia Mannheim,  
1068 Dr. Andreas Schmid, Dr. Rebecca Rock, Ines Herbon, Dr. Neele Hübner, Dr. Andreas Dieterich,  
1069 Hans Jörg Rahm, Dr. Carsten Calaminus, Funda Cay, Kristin Patzwaldt, Laura Kübler, Marilena  
1070 Poxleitner, Sabrina Buss and Dominik Seyfried for their administrative, technical, and  
1071 experimental support at the Department of Preclinical Imaging and Radiopharmacy, Werner  
1072 Siemens Imaging Center, Eberhard Karls University, Tuebingen. This study is also part of the  
1073 PhD theses of Sabina Marciano and Tudor Mihai Ionescu.

1074 **Funding**

- 1075 • German Research Foundation to KH
- 1076 • Carl-Zeiss-Foundation to KH
- 1077 • Deutscher Akademischer Austauschdienst to SM, KH
- 1078 • Werner Siemens Foundation to BJP

1079 **Author contributions**

- 1080 • Conceptualization: KH
- 1081 • Methodology: SM, TMI
- 1082 • Software: SM, TMI
- 1083 • Validation: SM
- 1084 • Formal analysis: SM, TMI

- 1085 • Investigation: SM, TMI, AM, RSS, RYC
- 1086 • Resources: BJP, DK
- 1087 • Data curation: SM
- 1088 • Writing – original draft: SM
- 1089 • Writing – review and editing: SM, TMI, AM, DK, RSS, RYC, BJP, KH
- 1090 • Supervision: KH
- 1091 • Project administration: KH
- 1092 • Funding acquisition: KH, BJP

### 1093 **Competing interests**

1094 The authors declare no conflict of interest.

### 1095 **Data availability**

1096 The original dataset will be made available upon request.

1097 **Figures**

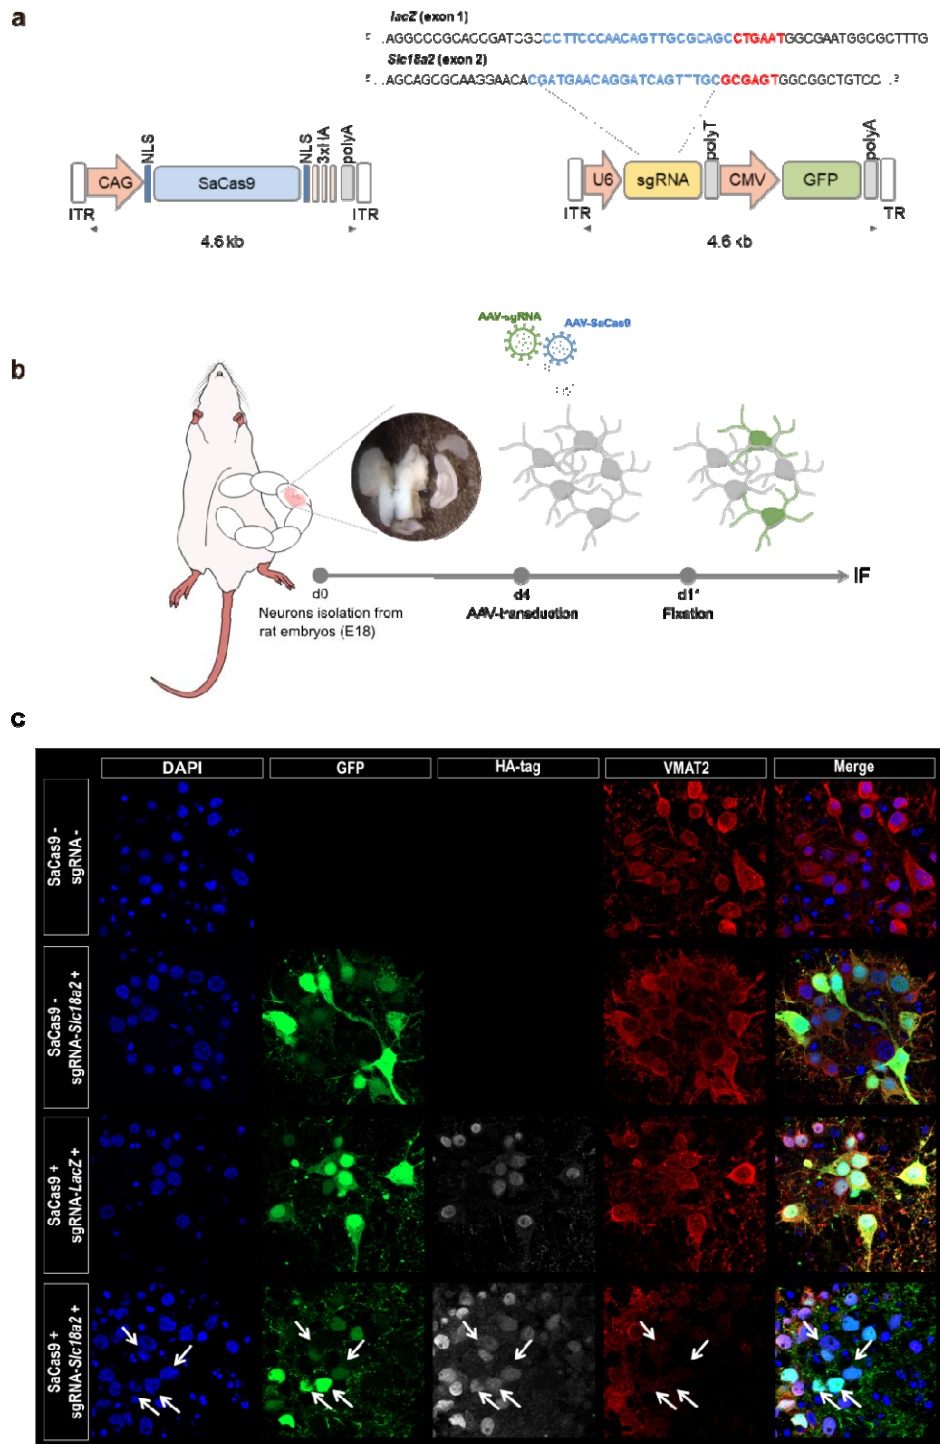

1098

1099 **Fig. 1 *In vitro* validation of CRISPR/SaCas9-induced VMAT2 knockdown in rat primary cortical**  
 1100 **neurons.** (a) AAV-SaCas9 and AAV-sgRNA expression vectors. (b) Experimental design for primary  
 1101 neurons isolation and transduction. (c) VMAT2 immunostaining (red), nuclei labeled with DAPI (blue). GFP  
 1102 (green) and HA-tag (white) indicate the expression of the sgRNA and SaCas9 vectors, respectively.

1103 VMAT2 KD (arrows) is shown in neurons transduced with AAVs carrying SaCas9 and sgRNA-*Slc18a2*. KD,  
1104 knockdown; ITR, inverted terminal repeat; CMV, cytomegalovirus promoter; GFP, green fluorescent  
1105 protein; CAG, CMV enhancer/chicken  $\beta$ -actin promoter; NLS, nuclear localization signal; HA-tag,  
1106 hemagglutinin tag; polyA, polyadenylation signal; polyT, polytermination signal.

1107

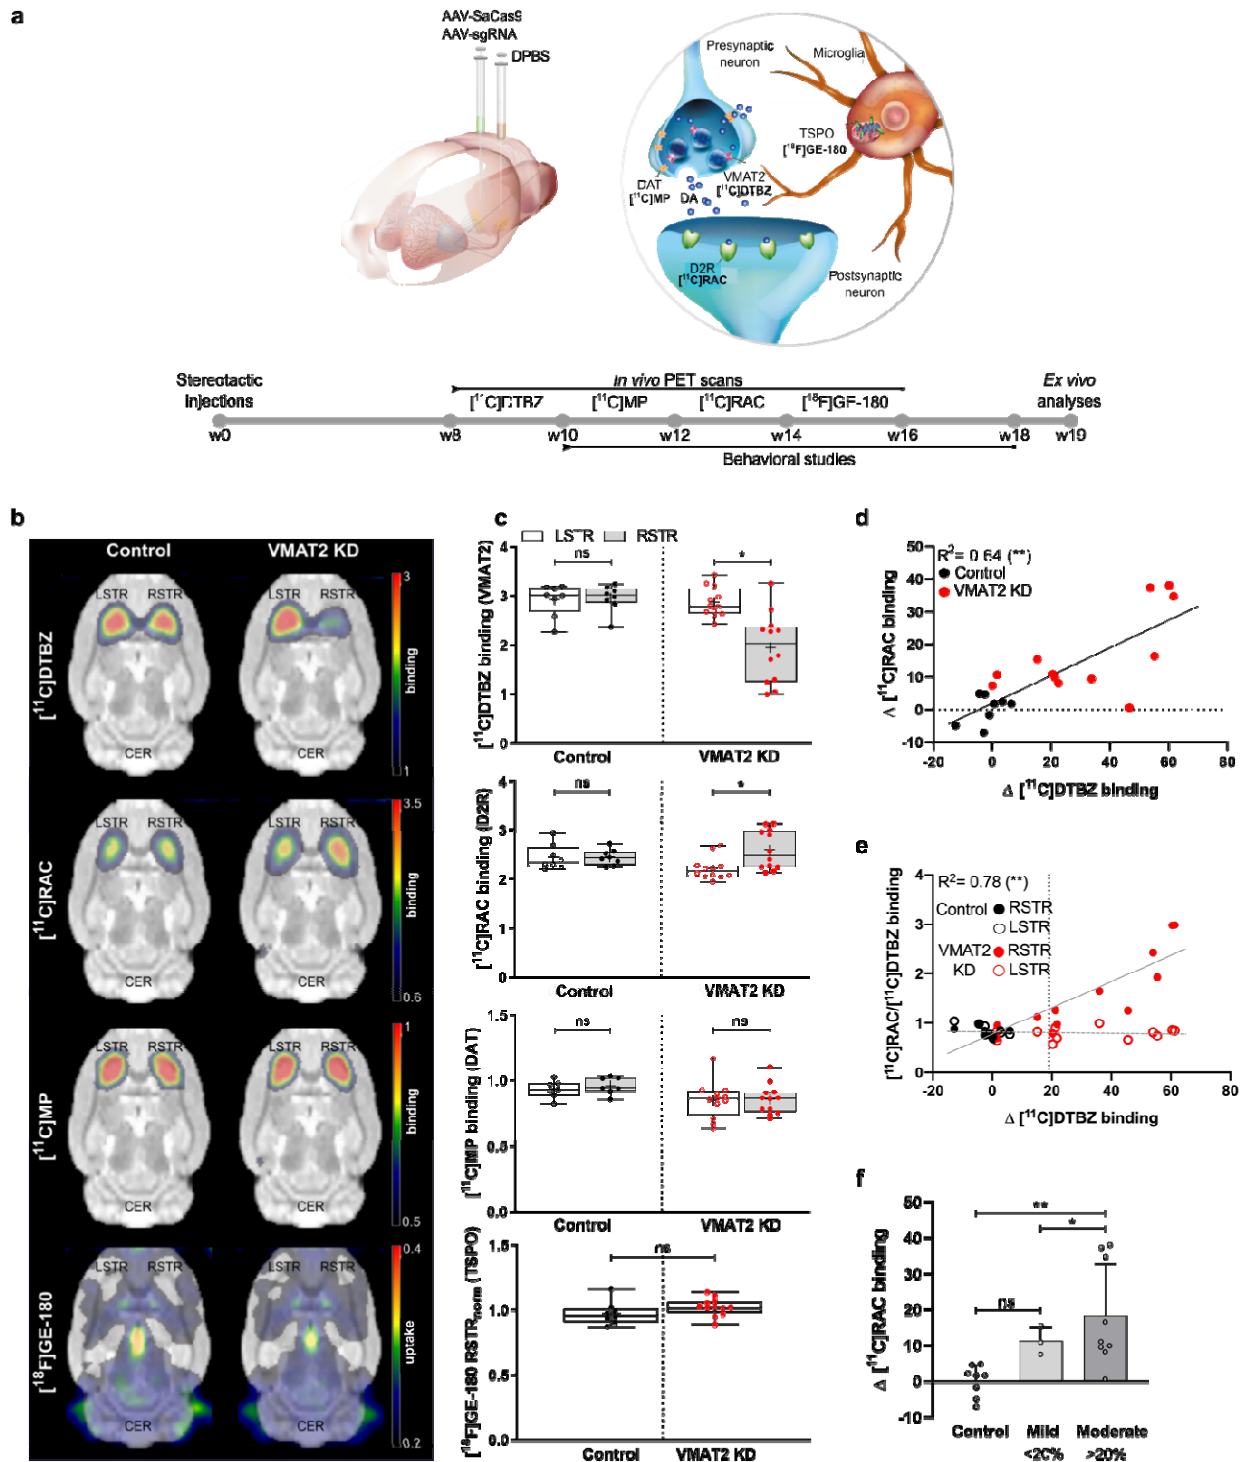

1108

1109 **Fig. 2 CRISPR/SaCas9-induced VMAT2 knockdown elicits postsynaptic changes but no nerve**  
 1110 **terminal loss or neuroinflammation in the adult rat brain.** (a) Schematic illustration of the experimental  
 1111 design. (b) Mean binding potential and uptake maps of control and VMAT2 KD rats co-registered to a rat  
 1112 brain atlas. (c) Binding potential values of individual control and VMAT2 KD rats in the left and right  
 1113 striatum. For  $[^{18}\text{F}]\text{GE-180}$  uptake values normalized to the left striatum are shown. (d) A strong correlation  
 1114 between  $\Delta [^{11}\text{C}]\text{RAC}$  and  $\Delta [^{11}\text{C}]\text{DTBZ}$  binding is shown. (e) Ratio of striatal  $[^{11}\text{C}]\text{RAC}$  and  $[^{11}\text{C}]\text{DTBZ}$   
 1115 binding shows prominent  $[^{11}\text{C}]\text{RAC}$  changes when a threshold of  $\sim 20\%$   $\Delta [^{11}\text{C}]\text{DTBZ}$  binding is reached.

1116 This threshold was set to separate the VMAT2 KD rats into *mild* and *moderate*. (f) *Mild* and *moderate* rats  
1117 could be differentiated based on the postsynaptic changes. \* $P < 0.01$ , \*\* $P < 0.001$ , Bonferroni-Sidak  
1118 corrected. Data are shown as boxplot with the median value (central mark), the mean value (plus sign),  
1119 interquartile range (boxes edges), and the extreme points of the distribution (whiskers). Control rats  $n = 8$ ;  
1120 VMAT2 KD rats  $n = 12$ . *Mild*:  $\Delta [^{11}\text{C}]\text{DTBZ}$  binding  $< 20\%$ ; *Moderate*:  $\Delta [^{11}\text{C}]\text{DTBZ}$  binding  $\geq 20\%$ . [ $^{11}\text{C}$ ]MP,  
1121 [ $^{11}\text{C}$ ]methylphenidate; [ $^{11}\text{C}$ ]RAC, [ $^{11}\text{C}$ ]raclopride; LSTR, left striatum; RSTR, right striatum; CER,  
1122 cerebellum; KD, knockdown; DAT, dopamine transporter; TSPO, translocator protein.

1123

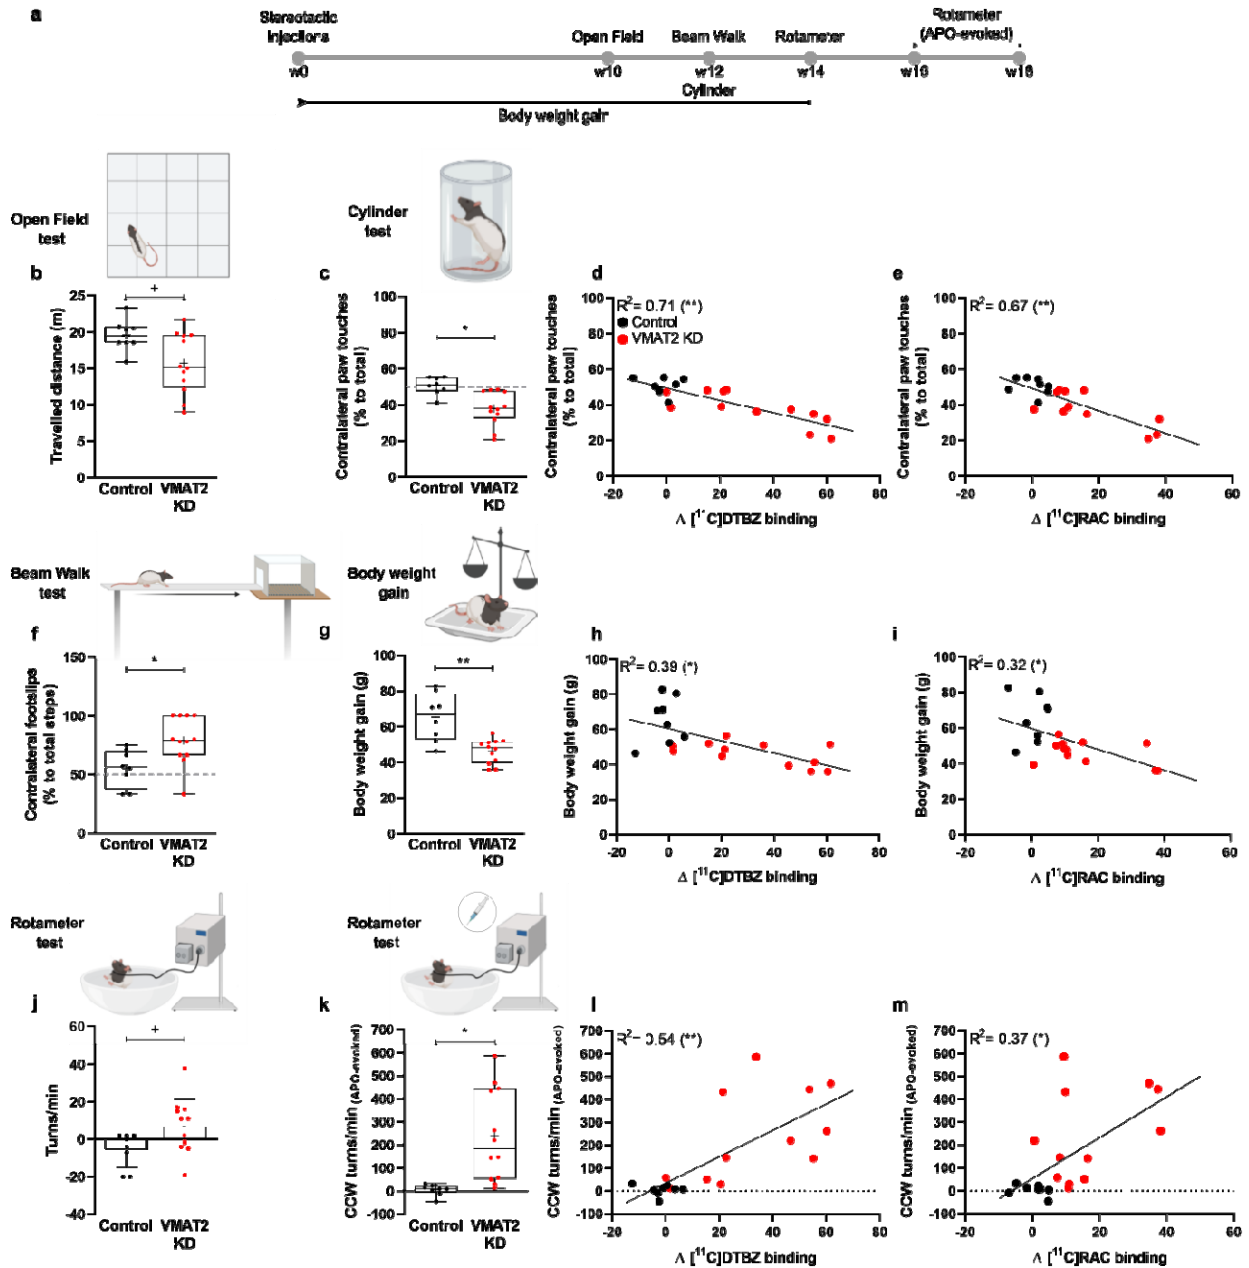

1124  
 1125 **Fig. 3 CRISPR/SaCas9-induced VMAT2 knockdown impairs motor function.** (a) Schematic illustration  
 1126 of the behavioral tests. (b) In the open field test, the distance travelled (m) by VMAT2 KD rats was reduced.  
 1127 (c) Cylinder test. VMAT2 KD rats showed a reduction in the contralateral paw touches, compared with  
 1128 controls. Rats performance in the cylinder test strongly correlated with VMAT2 expression changes  
 1129 ( $\Delta [^{11}\text{C}]\text{DTBZ}$  binding) and corresponding changes in dopamine availability ( $\Delta [^{11}\text{C}]\text{RAC}$  binding) (d,e). (f) In  
 1130 the beam walk test, VMAT2 KD rats displayed a higher number of footslips to the left contralateral side  
 1131 compared with control rats. (g) Body weight assessment 14 weeks after CRISPR/SaCas9 gene-editing  
 1132 showed reduced body weight gain in VMAT2 KD compared with control rats. (h,i) Body weight gain  
 1133 correlated with VMAT2 expression changes ( $\Delta [^{11}\text{C}]\text{DTBZ}$  binding) and corresponding changes in  
 1134 dopamine availability ( $\Delta [^{11}\text{C}]\text{RAC}$  binding). (j) Spontaneous rotation in a novel spherical environment  
 1135 showed increased CW rotations in VMAT2 KD rats compared with control rats. (k) Apomorphine-evoked  
 1136 rotational behavior. VMAT2 KD rats displayed a higher number of CCW rotations compared with control  
 1137 rats in the rotameter test. (l,m) Apomorphine-evoked rotations exhibited a strong correlation with VMAT2

1138 expression changes ( $\Delta$  [ $^{11}\text{C}$ ]DTBZ binding) and changes in dopamine availability ( $\Delta$  [ $^{11}\text{C}$ ]RAC binding).  
1139 Data are shown as boxplot with the median value (central mark), the mean value (plus sign), interquartile  
1140 range (boxes edges), and the extreme points of the distribution (whiskers).  $^*P < 0.05$ ,  $^*P < 0.01$ ,  $^{**}P < 0.001$ .  
1141 Control rats  $n = 8$ ; VMAT2 KD rats  $n = 12$ . CCW, counter-clockwise; APO, apomorphine; KD, knockdown;  
1142 [ $^{11}\text{C}$ ]RAC, [ $^{11}\text{C}$ ]raclopride. Illustrations in the figure were created with BioRender.com.

1143



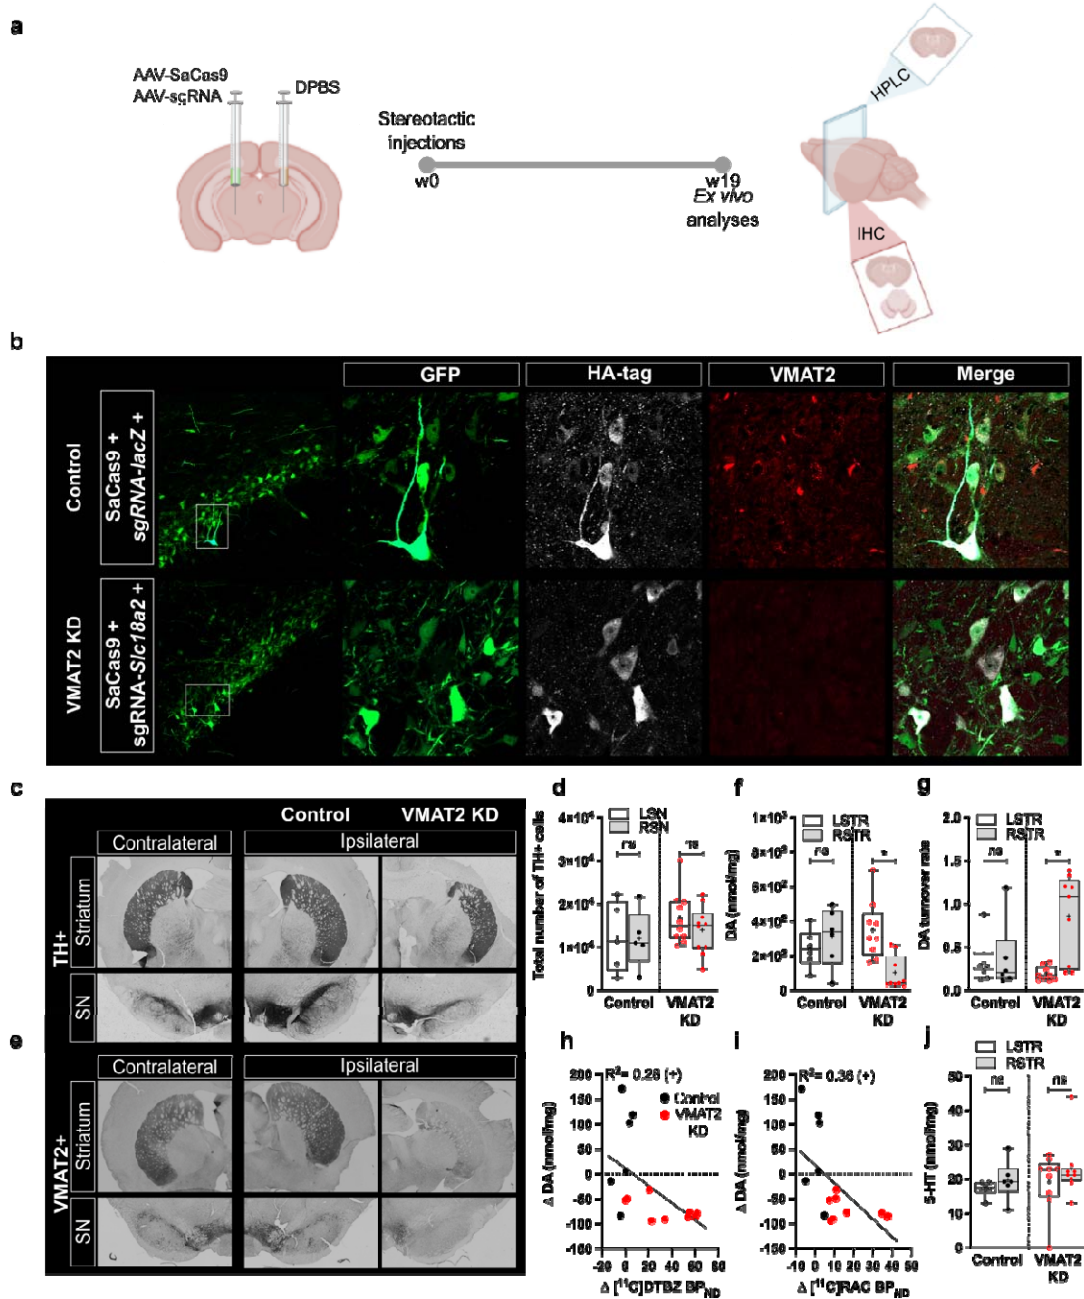

1144

1145 **Fig. 4 Ex vivo validation of the CRISPR/SaCas9-induced VMAT2 knockdown.** (a) Schematic illustration  
 1146 of the *ex vivo* analyses. (b) Immunofluorescence of nigral sections of control and VMAT2 KD rats  
 1147 confirmed the concomitant expression of SaCas9 and sgRNA. Staining for GFP (AAV-sgRNAs, green), HA-  
 1148 tag (AAV-SaCas9, white), and VMAT2 expression (red) for two exemplary rats is shown. VMAT2  
 1149 expression was largely reduced in the SNc of VMAT2 KD rats. (c,d) TH expression in the ipsilateral and  
 1150 contralateral striatum and SNc of VMAT2 KD (n= 10) and control (n= 5) rats evidenced no cell loss.  
 1151 (e) VMAT2 immunohistochemistry in the SNc and striatum confirmed large protein reduction in the ipsilateral  
 1152 hemisphere of VMAT2 KD rats. (f) Striatal dopamine, normalized to total protein concentration,  
 1153 was reduced in the ipsilateral striatum of VMAT2 KD (n= 9), but not control (n= 6) rats. This reduction  
 1154 was paralleled by increased metabolic outcome (g). (h,i) Dopamine changes correlated with the VMAT2 KD  
 1155 extent and postsynaptic changes, deduced from [ $^{11}$ C]DTBZ and [ $^{11}$ C]RAC, respectively. (j) 5-HT content  
 1156 was unaltered in the striata of control (n= 6) and VMAT2 KD (n= 9) rats. Data are shown as boxplot with the

1157 median value (central mark), the mean value (plus sign), interquartile range (boxes edges), and the  
1158 extreme points of the distribution (whiskers). \* $P < 0.05$ , \* $P < 0.01$ . GFP, green fluorescent protein; HA-tag,  
1159 hemagglutinin tag; KD, knockdown; TH, tyrosine hydroxylase; SN, substantia nigra; STR, striatum;  
1160 [ $^{11}\text{C}$ ]RAC, [ $^{11}\text{C}$ ]raclopride; DA, dopamine; 5-HT, serotonin. Metabolites' and neurotransmitters' striatal  
1161 content is reported in Table 3. Illustrations in the figure were created with BioRender.com.

1162

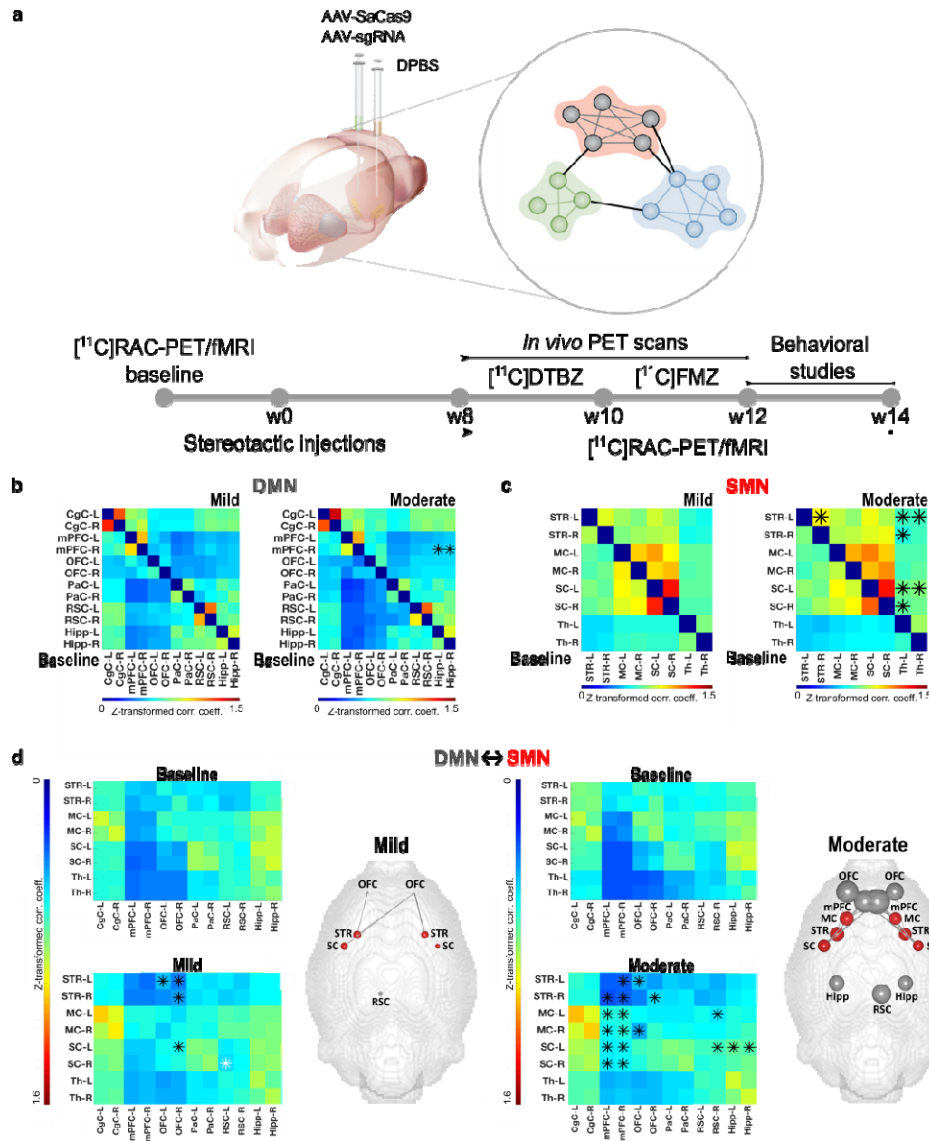

1163

1164 **Fig. 5 Increased resting-state functional connectivity after CRISPR/SaCas9-induced VMAT2**  
 1165 **knockdown.** (a) Schematic illustration of the experimental design. Group level correlation matrices of the  
 1166 DMN (b) and SMN (c) at baseline and after CRISPR/SaCas9-targeting for rats with a *mild* (left panel) and  
 1167 *moderate* (right panel) VMAT2 KD. In the *moderate* KD group rs-FC was increased between the right  
 1168 mPFC and right and left Hipp in the DMN (b) and between the contralateral SC and right and left Th, as  
 1169 well as between the left STR and right and left Th, in the SMN (c). (d) Internetwork rs-FC changes in the  
 1170 *mild* KD group indicated increased rs-FC between anterior regions of the DMN and the SMN (between the  
 1171 left OFC and STR, and between the right OFC and the left SC, and the right and left STR). Conversely, rs-  
 1172 FC was decreased between regions of the posterior DMN and the SMN (between the left RSC and right  
 1173 SC). In the *moderate* KD group, DMN-SMN rs-FC was increased. Brain graphs, right to the matrices,  
 1174 illustrate the nodes and edges (raw values) that demonstrated rs-FC changes to baseline (%). \**P* < 0.01.  
 1175 *Mild*: Δ [<sup>11</sup>C]DTBZ binding < 20%, n = 13; *Moderate*: Δ [<sup>11</sup>C]DTBZ binding ≥ 20%, n = 10. KD, knockdown;  
 1176 DMN, default-mode network; SMN, sensorimotor network. mPFC, medial prefrontal cortex; Hipp, hippocampus;  
 1177 SC, somatosensory cortex; Th, thalamus; STR, striatum; OFC, orbitofrontal cortex; RSC, retrosplenial cortex.  
 1178 Abbreviations of brain regions considered for the analysis of the fMRI data, including  
 1179 their respective volumes, are reported in Table 2.

1180

51

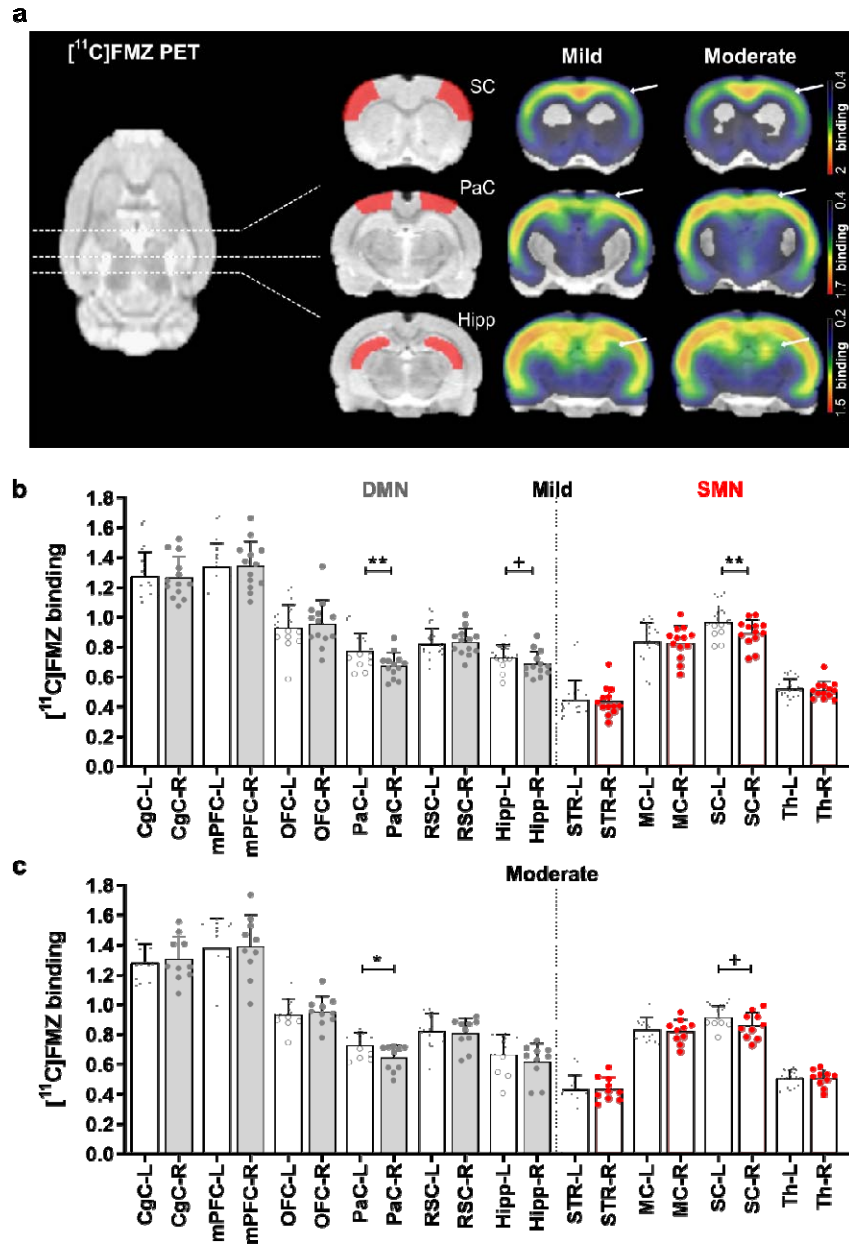

1181  
 1182 **Fig. 6 CRISPR/SaCas9-induced VMAT2 knockdown alters GABA signaling.** (a) [<sup>11</sup>C]FMZ mean binding  
 1183 potential maps of *mild* and *moderate* VMAT2 KD rats co-registered to a rat brain atlas. Arrows and ROIs  
 1184 in coronal sections indicate brain regions of the DMN and SMN with altered [<sup>11</sup>C]FMZ binding. [<sup>11</sup>C]FMZ  
 1185 binding potentials from VOI-based analysis in DMN and SMN regions of rats with *mild* (b) and *moderate* (c)  
 1186 VMAT2 KD. [<sup>11</sup>C]FMZ binding was decreased in the right PaC, SC, and Hipp of *mild* KD rats (b) and right  
 1187 PaC and SC of *moderate* KD rats (c). \**P* < 0.05, \*\**P* < 0.01, \*\*\**P* < 0.001, Bonferroni-Sidak corrected. Data are  
 1188 shown as mean ± SD. *Mild*: Δ [<sup>11</sup>C]DTBZ binding < 20%, n = 13; *Moderate*: Δ [<sup>11</sup>C]DTBZ binding ≥ 20%,  
 1189 n = 10. KD, knockdown; [<sup>11</sup>C]FMZ, [<sup>11</sup>C]flumazenil; DMN, default-mode network; SMN, sensorimotor  
 1190 network. PaC, parietal cortex; Hipp, hippocampus; SC; somatosensory cortex. Abbreviations of brain  
 1191 regions, including their respective volumes, are reported in Table 2.  
 1192

1193 **Tables**

1194 **Table 1: sgRNAs sequences.**

1195

1196

1197

| SgRNAs         | DNA Target Sequences  | PAM (NNGRRT) |
|----------------|-----------------------|--------------|
|                | 5'- 3'                | 5'- 3'       |
| <i>Slc18a2</i> | CGATGAACAGGATCAGTTTGC | GCGAGT       |
| <i>lacZ</i>    | CCTTCCCAACAGTTGCGCAGC | CTGAAT       |

1198

1199 **Table 2: Brain regions included in the Paxinos rat brain atlas, including their respective volumes**  
1200 **and abbreviations.**

| Brain region (ROI)       | Hemisphere | ROI volume [mm <sup>3</sup> ] | Abbreviation |
|--------------------------|------------|-------------------------------|--------------|
| Striatum                 | left       | 43.552                        | STR          |
|                          | right      |                               |              |
| Cingulate Cortex         | left       | 14.480                        | CgC          |
|                          | right      |                               |              |
| Medial Prefrontal Cortex | left       | 6.304                         | mPFC         |
|                          | right      |                               |              |
| Motor Cortex             | left       | 32.608                        | MC           |
|                          | right      |                               |              |
| Orbitofrontal Cortex     | left       | 18.936                        | OFC          |
|                          | right      |                               |              |
| Parietal Cortex          | left       | 7.632                         | PaC          |
|                          | right      |                               |              |
| Retrosplenial Cortex     | left       | 18.920                        | RSC          |
|                          | right      |                               |              |
| Somatosensory Cortex     | left       | 71.600                        | SC           |
|                          | right      |                               |              |
| Hippocampus              | left       | 25.064                        | Hipp         |
|                          | right      |                               |              |
| Thalamus                 | left       | 30.712                        | Th           |
|                          | right      |                               |              |

1201

1202 **Table 3: Dopamine, 3,4-Dihydroxyphenylacetic acid (DOPAC), homovanillic acid (HVA), and**  
 1203 **serotonin (5-HT) striatal content (nmol/mg) determined by HPLC.**

| Neurotransmitter<br>/<br>Metabolite | nmol/mg<br>(mean ± SD) |           |
|-------------------------------------|------------------------|-----------|
|                                     | Control                | VMAT2 KD  |
| DA                                  |                        |           |
| STR-L                               | 244 ± 109              | 351 ± 168 |
| STR-R                               | 308 ± 166              | 100 ± 97  |
| DOPAC                               |                        |           |
| STR-L                               | 34 ± 7                 | 34 ± 11   |
| STR-R                               | 38 ± 4                 | 27 ± 5    |
| HVA                                 |                        |           |
| STR-L                               | 24 ± 5                 | 25 ± 5    |
| STR-R                               | 26 ± 6                 | 19 ± 4    |
| 5-HT                                |                        |           |
| STR-L                               | 17 ± 2                 | 19 ± 8    |
| STR-R                               | 19 ± 6                 | 23 ± 9    |

1204
